# **An autoregulatory feedback loop converging on H2A ubiquitination drives synovial sarcoma**

Nezha S. Benabdallah<sup>1</sup>, Vineet Dalal<sup>1</sup>, Afroditi Sotiriou<sup>1</sup>, R. Wilder Scott<sup>2</sup>, Felix K.F. Kommos<sup>1,3</sup>, Anastasija Pejkovska<sup>1</sup>, Ludmila Gaspar<sup>1</sup>, Lena Wagner<sup>1</sup>, Francisco J. Sánchez-Rivera<sup>4</sup>, Monica Ta<sup>5</sup>, Shelby Thornton<sup>5</sup>, Torsten O. Nielsen<sup>5</sup>, T. Michael Underhill<sup>2</sup>, Ana Banito\*<sup>1</sup>

<sup>1</sup> Pediatric Soft tissue sarcoma research group, Hopp Children's Cancer Center, Heidelberg (KITZ), German Cancer Research Center (DKFZ), 69120 Heidelberg, Germany.

<sup>2</sup> Department of Cellular and Physiological Sciences, Faculty of Medicine, University of British Columbia, Vancouver, BC V6T 1Z3, Canada.

<sup>3</sup> Institute of Pathology, University of Heidelberg, 69120 Heidelberg, Germany.

<sup>4</sup> Cancer Biology and Genetics Program, Memorial Sloan Kettering Cancer Center, Sloan Kettering Institute, New York, NY 10065, USA.

<sup>5</sup> Department of Pathology and Laboratory Medicine, Vancouver Coastal Health Research Institute and Faculty of Medicine, University of British Columbia, Vancouver, Canada.

\*Correspondence to: [a.banito@kitz-heidelberg.de](mailto:a.banito@kitz-heidelberg.de)

29 **ABSTRACT**

30 The SS18-SSX fusion drives oncogenic transformation in synovial sarcoma by bridging SS18,  
31 a member of mSWI/SNF complex, to Polycomb repressive complex 1 (PRC1) target genes.  
32 Here we show that the SSX C-terminus, via its SSXRD domain, directs SS18-SSX chromatin  
33 binding independently of SS18. SSXRD specific targeting is mediated by interaction with  
34 mono ubiquitinated H2A (H2AK119ub1) and histone MacroH2A with which the fusion  
35 overlaps genome wide. Variant Polycomb Repressive Complex 1.1 (PRC1.1) acts as the main  
36 depositor of H2AK119ub1 and is therefore required for SS18-SSX occupancy. Importantly,  
37 the SSX C-terminus not only depends on H2AK119ub1 for localization but also further  
38 increases it by promoting PRC1.1 complex stability. Consequently, high H2AK119ub1 levels  
39 are a feature of murine and human synovial sarcomas. These results reveal an SSX/PRC1  
40 autoregulatory feedback loop that reinforces fusion chromatin binding and therefore its  
41 oncogenic activity, and could play a role in a wider range of cancers and physiological settings  
42 where SSX proteins are overexpressed.

43

## 44 INTRODUCTION

45 The Polycomb group (PcG) repressive system is an indispensable regulator of precise gene  
46 expression in all eukaryotes. Two classes of Polycomb proteins form distinct multi-protein  
47 complexes: Polycomb Repressive Complex 1 (PRC1), which mono-ubiquitylates histone H2A  
48 at lysine 119 (H2AK119ub1), and Polycomb Repressive Complex 2 (PRC2), which mono-,  
49 di-, and tri-methylates histone H3 at lysine 27 (H3K27me1, H3K27me2, and H3K27me3)<sup>1,2</sup>.  
50 Polycomb mediated regulation of gene expression is critical for embryogenesis as alterations  
51 in H2AK119ub1 and H3K27me3 levels lead to inappropriate expression of Polycomb target  
52 genes and embryonic defects<sup>3-7</sup>. The catalytic core of PRC1 is formed by RING1A or RING1B  
53 and one of six PCGF proteins, giving rise to distinct protein assemblies that comprise canonical  
54 PRC1 (cPRC1) or variant PRC1 (vPRC1) complexes<sup>8,9</sup>. vPRC1 complexes containing  
55 PCGF1/3/5/6 synergize to deposit the majority of the highly dynamic H2AK119ub1 mark<sup>10-12</sup>.  
56 Via H2AK119ub1 deposition, these complexes contribute globally to Polycomb domain  
57 formation through subsequent recruitment of PRC2 and H3K27me3. Ultimately, this triggers  
58 further recruitment of cPRC1 containing PCGF2/4 and CBX proteins, consolidating  
59 Polycomb-mediated gene repression<sup>7,13-15</sup>. PCGF1-containing complexes (PRC1.1) recognize  
60 unmethylated CpG islands via the ZF-CxxC domain of its KDM2B sub-unit<sup>8,16-20</sup> and are  
61 responsible for H2AK119ub1 deposition at key developmental genes<sup>17,21,22</sup>. We recently  
62 showed that KDM2B function is hijacked in synovial sarcoma<sup>23</sup> and several studies uncovered  
63 recurrent mutations in the PRC1.1 subunit BCOR in paediatric solid tumours, altogether  
64 suggesting a prominent role for PRC1.1 in tumour formation<sup>24-29</sup>.

65 Sarcomas are a group of cancers arising in soft tissues or bone that disproportionately affect  
66 children and young adults. Like other paediatric cancers, many types of sarcoma display a low  
67 mutational burden and are driven by dominant fusion oncoproteins involving chromatin  
68 associated regulators and transcription factors<sup>30</sup>. Synovial sarcoma, one of the more common  
69 soft tissue tumours in this class, is driven by the in-frame fusion of the mammalian SWI/SNF  
70 (mSWI/SNF or BAF) chromatin remodelling complex subunit SS18, where the last eight amino  
71 acids are replaced by the C-terminal 78 amino acids of SSX1, SSX2, or, rarely, SSX4<sup>31,32</sup>.  
72 Biochemical and proteomic studies have identified that SS18-SSX integrates into the  
73 mSWI/SNF via SS18 leading to the eviction of the tumour suppressor subunit SMARCB1 (also  
74 called BAF47 or hSNF5)<sup>33,34</sup>. This led to the idea that an altered mSWI/SNF complex is  
75 required for tumour formation<sup>33,35</sup>. However, later studies showed that SMARCB1 loss is not  
76 required for SS18-SSX driven tumourigenesis and rather it generates tumours with epithelioid

77 sarcoma features in mice<sup>35,36</sup>. Thus, it is unclear to what extent mSWI/SNF complex de-  
78 regulation is the defining event for synovial sarcoma identity.

79 We previously showed that SS18-SSX1 co-occupies KDM2B/PRC1.1 target sites and that  
80 KDM2B suppression disrupts SS18-SSX chromatin occupancy triggering proliferative arrest  
81 and acquisition of a fibroblast-like morphology<sup>23</sup>. Consequently, SS18-SSX guides the  
82 mSWI/SNF complex to Polycomb target genes leading to their aberrant activation<sup>23,36</sup>. Our  
83 previous work pinpointed PRC1.1 de-regulation as critical to sustain synovial sarcoma  
84 transformation. However, whether SS18-SSX recruitment onto chromatin at KDM2B sites is  
85 mediated by direct interactions with PRC1.1 members or by an indirect mechanism remained  
86 unclear.

87 Here we combine CRISPR/Cas9 gene-tiling screens, proteomics, FRET-based proximity  
88 assays and other molecular analyses to dissect SS18-SSX's chromatin localizing mechanism.  
89 We show that the SSX C-terminus is solely responsible for SS18-SSX chromatin binding at its  
90 specific targets by interaction with H2AK119ub1 and histones MacroH2A. In addition to  
91 H2AK119ub1 deposition, we show that variant PRC1.1 can recruit histones MacroH2A, which  
92 to date lack a characterised chaperone, and is therefore critical to establish SS18-SSX  
93 chromatin localisation and maintenance. Furthermore, we uncover an autoregulatory feedback  
94 loop in which SS18-SSX both binds to and promotes H2AK119ub1 via two pathways - by up-  
95 regulating the expression of PRC1.1 members *BCOR* and *RYBP*, and by stabilising the PRC1.1  
96 complex presence on chromatin via its SSX-C domain. This autoregulatory mechanism allow  
97 SS18-SSX to reinforce its own activity and results in acquisition of high H2AK119ub1 levels  
98 during synovial sarcoma tumorigenesis.

99

## 100 **RESULTS**

### 101 **The SSX C-terminus is sufficient for tight and specific SS18-SSX chromatin binding**

102 To map protein domains in SS18-SSX that are essential for tumour maintenance, we performed  
103 a CRISPR-Cas9 knockout screen using a gene-tiling sgRNA library covering the entire SS18  
104 and SSX1 coding sequences (**Fig. 1a**). In this assay, sgRNAs targeting DNA sequences coding  
105 for essential protein domains often result in a more significant dropout, since even small in-  
106 frame indels in these regions are likely to affect protein function and cell fitness<sup>37,38</sup>. We  
107 screened for critical SS18-SSX1 domains in the HS-SY-II synovial sarcoma cell line and used

108 ProTiler to map CRISPR knockout hyper-sensitive (CKHS) regions<sup>39</sup>. As expected, sgRNAs  
109 targeting SS18 were generally depleted with the exception of those targeting a region that is  
110 not present in SS18's shorter isoform (aa 295-325). Still, a clear CKHS region was identified  
111 at the SSX C-terminus corresponding to the highly conserved SSXRD (SSX Repression  
112 Domain)<sup>40,41</sup> (**Fig. 1b, Extended Fig.1a,b**). These results suggest that this region, consisting  
113 in the last 34 amino acids of SS18-SSX1, is most critical for its oncogenic function.

114 To explore the role of SSXRD, we generated constructs containing eGFP fused to the SSX1  
115 C-terminal region present in SS18-SSX1, with or without a SSXRD deletion (SSX-C<sup>ARD</sup> and  
116 SSX-C, respectively) or the SSXRD alone. SS18 and SS18-SSX1 eGFP fusions were used as  
117 controls (**Fig. 1c**). When expressed in HEK293T, eGFP-SS18 exhibits both nuclear and  
118 cytoplasmic localisation. In contrast, eGFP-SS18-SSX1, SSX-C and SSXRD are exclusively  
119 detected in the nucleus. Most importantly, SSX-C nuclear localisation depends on the SSXRD  
120 domain, as eGFP-SSX-C<sup>ARD</sup> loses the exclusive nuclear pattern. This further supports the  
121 presence of a nuclear localisation signal in the SSXRD (**Fig. 1d**)<sup>42</sup> and is suggestive of a key  
122 role of this region in mediating chromatin interaction.

123 To assess the presence and strength of the association between SSX1 C-terminus and chromatin  
124 we performed sequential salt extractions. Chromatin-associated proteins become more soluble  
125 with increasing concentrations of NaCl, with proteins strongly bound to DNA, such as histones  
126 H2A/H2B, eluting at high salt concentrations (>800 mM)<sup>43-45</sup>. We observed that SSXRD is  
127 tightly bound to chromatin and is resistant to 500mM salt extraction. Similarly, SSXRD-  
128 containing GFP fusions, but not eGFP-SSX-C<sup>ARD</sup>, are predominantly present in the chromatin  
129 fraction indicating that SS18-SSX strongly binds chromatin via this domain at the SSX C-  
130 terminus (**Fig. 1e, f**). To determine if SSX-C alone can reproduce the SS18-SSX-specific  
131 genome wide occupancy, we performed chromatin immunoprecipitation sequencing (ChIP-  
132 Seq) of eGFP-SSX-C overexpression in HS-SY-II synovial sarcoma cells. This revealed a clear  
133 overlap with previously identified SS18-SSX/KDM2B bound regions which was abolished in  
134 the absence of the SSXRD domain (**Fig. 1g, h**). These results indicate that the SSX c-terminus,  
135 via its SSXRD, binds specific regions in the genome and determines SS18-SSX localisation  
136 independently of SS18 and therefore of the mSWI/SNF complex.

137 In line with these results, recent studies identified SSX fusions in synovial sarcoma involving  
138 alternative activators such as EWSR1 and MN1<sup>46</sup>. This potentially indicates that recruitment  
139 of other partners fused to the SSX C-terminus can result in the activation of PRC1.1 target

140 genes. To test this hypothesis, we expressed *EWSR1-SSX1* and *MNI-SSX1* in human  
141 mesenchymal stem cells (**Fig. 1i**). Similar to SS18-SSX1, expression of the new fusions  
142 resulted in specific up-regulation of PRC1.1 target genes that are part of the synovial sarcoma  
143 gene signature (**Fig. 1j**)<sup>23</sup>. These results demonstrates that induction of Polycomb target genes  
144 can be achieved by recruitment of other transcriptional activators, and that the SSXRD is the  
145 key element that defines a synovial sarcoma signature.

#### 146 **The SSXRD acidic tail links SSX to histone H2AK119ub1 and MacroH2A domains**

147 Consistent with a tight SSXRD-dependent chromatin binding, SS18-SSX and SSX-C remain  
148 associated with condensed chromosomes during mitosis (**Extended Fig. 1c**)<sup>47</sup>. However,  
149 neither KDM2B, PCGF1, nor RING1B binds the mitotic chromosome to the same extent as  
150 SSXRD, suggesting that the SSX C-terminus can bind chromatin independently of the presence  
151 of these PRC1.1 components (**Extended Fig. 1d**). To identify candidate factors mediating  
152 SSX-C/SSXRD chromatin binding, we investigated the common interactome of SSX-C and  
153 SSXRD by performing eGFP co-immunoprecipitation followed by mass spectrometry (**Fig.**  
154 **2a**). Enriched proteins were defined by normalization to SSX-C<sup>ARD</sup> pull- down which, as  
155 expected, showed a strong overlap with the eGFP-only negative control. Noticeably, histones  
156 were highly represented in both SSX-C and SSXRD top interactors, with higher enrichment  
157 than PRC1 or PRC2 components, indicating that SSX-C can bind chromatin via a direct histone  
158 interaction (**Fig. 2b**).

159 Recent *in vitro* biochemistry studies showed the ability of SSX-C to bind the nucleosome acidic  
160 patch, with a preference for H2AK119ub1-modified nucleosomes conferred by the last 5 amino  
161 acids (EEDDE) of the SSXRD<sup>41,48</sup>. We generated an eGFP-fused SSX-C mutant lacking the  
162 last 5 amino acids of SSXRD (SSX-C<sup>E184\*</sup>). Accordingly, when expressed in HEK293T cells  
163 which contain several copies of the X chromosome, SSX-C<sup>E184\*</sup> loses the SSXRD specific co-  
164 localisation to H2AK119ub1-rich Barr bodies, whilst maintaining a nuclear localisation pattern  
165 (**Extended Fig. 2a**). Therefore, to further dissect SSX-C interactors driving SSX specific  
166 chromatin occupancy, we compared eGFP pull-downs of SSX-C with that of SSX-C<sup>E184\*</sup>.  
167 Remarkably, our proteomic analysis indicated that in addition to histone H2A, other histones  
168 H2A variants such as MacroH2A1, H2AX, H2AZ and MacroH2A2, appeared to be strong  
169 interactors (**Fig. 2c**).

170 To investigate the H2AK119ub1/SSX-C interaction in live cells, we performed NanoBret, a  
171 protein-protein interaction assay based on bioluminescence resonance energy transfer

172 (BRET)<sup>49,50</sup>. We detected an interaction of the SSX-C (Halo-SSX-C) when co-expressed with  
173 histone H2A fused to Nano Luciferase (NLuc-H2A). This interaction was dependent on the  
174 SSXRD domain and was diminished in the SSX-C<sup>E184\*</sup> mutant (**Fig. 2d**). These results support  
175 a role for the EEDDE-containing SSXRD domain in targeting of SS18-SSX to nucleosomes.  
176 Next, to test if H2AK119ub1 plays a role in SSXRD chromatin targeting in living cells we  
177 performed NanoBret, this time expressing either wild-type histone H2A (NLuc-H2A) or a  
178 mutant H2A that cannot be ubiquitinated, (NLuc-H2A<sup>K118K119R</sup>)<sup>51</sup> (**Fig. 2e**). The absence of  
179 ubiquitination decreased the ability of SSX-C to interact with the nucleosome *in vivo* indicating  
180 that H2AK119ub1 plays an active role in specifying SS18-SSX chromatin occupancy (**Fig.**  
181 **2d**).

182 As MacroH2A histones have been previously linked with Polycomb co-occupancy,  
183 transcriptional repression and X chromosome inactivation<sup>52-56</sup> we set out to test this additional  
184 link between PRC1 and SS18-SSX activity in synovial sarcoma. MacroH2A histones contain  
185 a homologous histone domain that is integrated in the nucleosome, followed by a linker region  
186 and a large macro domain that extends outside of the nucleosome<sup>57</sup>. MacroH2A1 and  
187 MacroH2A2 proteins are encoded by *H2AFY* and *H2AFY2* with MacroH2A1 presenting with  
188 two isoforms (MacroH2A1.1 and MacroH2A1.2) that differ in a single exon (**Fig. 2f**). We first  
189 confirmed the co-localisation of the three different MacroH2A histones, MacroH2A1.1,  
190 MacroH2A1.2 and MacroH2A2, with SSX-C at the inactive X chromosome in HEK293T cells  
191 (**Extended Fig. 2b**). Next, we performed NanoBret using NLuc-MacroH2A1.2 or Nluc-  
192 MacroH2A2 and we observed an interaction between MacroH2A1.2/MacroH2A2 and SSX-C  
193 that was significantly diminished in SSX-C<sup>E184\*</sup> (**Fig. 2g, h**).

194 To gain insight into global chromatin co-occupancy of SS18-SSX1, H2AK119ub1 and  
195 MacroH2A2, we performed CUT&RUN<sup>58</sup> using a HS-SY-II synovial sarcoma cell line where  
196 SS18-SSX1 is endogenously labelled with an HA-tag<sup>23</sup>. This revealed that MacroH2A2 is  
197 present at sites highly enriched in H2AK119ub1 and HA-SS18-SSX1 (*MNX1*, *KCNQ2*, *UNCX*,  
198 *SOX8*) (**Fig. 2i, j**). However, characteristic MacroH2A2 broad domains<sup>56,59</sup> did not correlate  
199 with SS18-SSX, nor H2AK119ub1 (**Fig. 2j**) indicating that MacroH2A2 alone is not sufficient  
200 to cause SS18-SSX targeting. Accordingly, SS18-SSX1 and H2AK119ub1 genome occupancy  
201 profiles strongly correlate, whilst MacroH2A2 does so moderately (**Extended Fig. 2c**).  
202 Together, our results highlight that a very specific chromatin environment containing both  
203 H2AK119ub1-modified nucleosomes and histone variant MacroH2A underlies SSX C-  
204 terminus chromatin binding.

205 **PRC1.1 deposits H2AK119ub1 and MacroH2A and mediates SS18-SSX recruitment**  
206 **independently of PRC2**

207 The chromatin environments bound by SSXRD that are rich in H2AK119ub1 and MacroH2A  
208 are also co-occupied by several other chromatin regulators. vPRC1 deposits H2AK119ub1  
209 which is recognized and bound by PRC2. This leads to H3K27me3 deposition which in turn  
210 results in cPRC1 recruitment<sup>7,13-15</sup>.

211 To dissect the hierarchy of SS18-SSX targeting at Polycomb sites, we first assessed whether  
212 KDM2B, which mediates recruitment of PRC1.1, is sufficient to recruit SS18-SSX onto  
213 chromatin. To this end, we took advantage of a previously described artificial targeting  
214 approach where KDM2B is fused to the methyl binding domain (MBD) of MBD1 leading to  
215 its re-targeting to regions of densely methylated DNA such as pericentromeric heterochromatin  
216 (**Fig. 3a**)<sup>60,61</sup>. Additionally, a critical residue in the zf-CXXC DNA binding domain of  
217 KDM2B<sup>62</sup> is mutated so that the MBD-fused protein can only bind methylated DNA (MBD-  
218 KDM2B<sup>K643A</sup> referred to as MBD-KDM2B). MBD fused to Luciferase (MBD-Luc) was used  
219 as control to assess specific targeting (**Fig. 3a**). We first confirmed the correct tethering of the  
220 MBD-fused proteins to heterochromatin using immunofluorescence in the human synovial  
221 sarcoma cell line HS-SY-II harbouring endogenously HA tagged SS18-SSX<sup>23</sup>. We observed a  
222 specific co-localisation of the MBD constructs, marked by a V5 tag, to heterochromatin protein  
223 1 (HP1) foci (**Extended Fig. 3a**). As expected, MBD-KDM2B, but not MBD-Luc, was able to  
224 recruit PRC1.1 components BCOR and PCGF1, resulting in H2AK119ub1 deposition at  
225 V5/HP1 foci (**Fig. 3b, Extended Fig. 3b**). Most importantly, MBD-KDM2B was sufficient to  
226 recruit SS18-SSX1 (**Fig. 3c**). Interestingly, MBD-KDM2B did not lead to accumulation of  
227 H3K27me3 at the V5/HP1 foci (**Fig. 3d**), indicating that PRC2 could not be involved in SS18-  
228 SSX recruitment. To further dissect the role of PRC1.1 and PRC2 in SS18-SSX recruitment,  
229 we employed genetic knock-out of the PRC1.1 or PRC2 components using CRISPR/Cas9-  
230 directed mutagenesis<sup>38,63,64</sup> (**Extended Fig. 3c**). Remarkably, depleting the PRC1.1  
231 components BCOR or PCGF1 but not the PRC2 components EED or EZH2 significantly  
232 reduced SS18-SSX1 recruitment and H2AK119ub1 deposition mediated by MBD-KDM2B  
233 (**Figure 3e, Extended Fig. 3d**). Consistent with our observations, MBD-KDM2B tethering did  
234 not lead to recruitment of PRC2 components (**Extended Fig. 3e**). Together these results  
235 indicate that SS18-SSX1 targeting can be initiated by KDM2B, relies on an intact PRC1.1  
236 complex but is independent from PRC2 activity.



237 MacroH2A histones deposition has been mainly associated with PRC2 even though the  
238 chaperone orchestrating its deposition at these sites remains unknown<sup>65</sup>. We took advantage of  
239 the MBD-KDM2B tethering assay to dissect the interplay between PRC1.1, MacroH2A and  
240 H2AK119ub1 deposition. We observed an unanticipated concomitant deposition of MacroH2A  
241 histones that in synovial sarcoma cells occurs independently of H3K27me3 (**Extended Fig.**  
242 **3f**), suggesting that PRC1.1 could additionally promote the SS18-SSX oncofusion recruitment  
243 by fostering MacroH2A incorporation.

244 To test their requirement for tumour cell maintenance, we removed both MacroH2A isoforms  
245 (sg*H2AFY* combined with sg*H2AFY2*, referred to as sgMacroH2A) or *PCGF1* in HS-SY-II  
246 synovial sarcoma cells and in KHOS-240s osteosarcoma cells using CRISPR/Cas9-directed  
247 mutagenesis with sgRNAs carrying an eGFP reporter. We observed that, like sgPCGF1,  
248 sgMacroH2A specifically impacted synovial sarcoma cell growth, albeit with a much milder  
249 effect in the case of MacroH2A (**Extended Fig. 3g**). We then assessed whether MacroH2A is  
250 required for *de novo* recruitment of SS18-SSX1 using the MBD assay, we observed that only  
251 PCGF1 knockout but not MacroH2A removal led to a significant decrease in SS18-SSX  
252 recruitment (**Fig. 3f**). Importantly, PRC1.1 removal affected the accumulation of both  
253 H2AK119ub1 and MacroH2A, indicating that MacroH2A deposition depends on PRC1.1  
254 activity in synovial sarcoma cells (**Fig. 3f, g, Extended Fig. 3h**). We therefore uncovered a  
255 role for PRC1.1 in promoting accumulation of MacroH2A histones independently of PRC2.  
256 Thus, PRC1.1 is sufficient to establish H2AK119ub1 and MacroH2A-rich chromatin  
257 environments that are recognized by SSXR D.

### 258 **PRC1.1 controls global H2AK119ub1 deposition and is required for SS18-SSX occupancy**

259 As several PRC1 complexes can mediate H2AK119ub1 deposition, it raises the question of  
260 whether PRC1.1 inhibition alone in synovial sarcoma cells is able to deplete the mark resulting  
261 in loss of SS18-SSX at its target sites. To assess the global effect of PCGF1 removal on SS18-  
262 SSX recruitment and H2AK119ub1 genome-wide, we used CUT&RUN to profile PCGF1  
263 knockout in HS-SY-II and SYO-1 cells, harbouring SS18-SSX1 and SS18-SSX2 fusions  
264 respectively. Strikingly, PCGF1 knockout led to a global decrease in H2AK119ub1 deposition  
265 alongside a strong reduction in SS18-SSX1/2 chromatin occupancy in both cell lines  
266 illustrating the pivotal role of variant PRC1.1 in SS18-SSX chromatin maintenance (**Fig. 4a,**  
267 **b, c**).

268 We next assessed if PCGF3, a member of another PRC1 variant, PRC1.3, and a known  
269 dependency in synovial sarcoma (<https://depmap.org/portal/>), can impact SS18-SSX chromatin  
270 binding to the same extent as PCGF1. To compare the global action of PCGF1 versus PCGF3  
271 in an unbiased manner, we performed chromatin salt extraction on SS18-SSX in both HS-SY-  
272 II and SYO-I synovial sarcoma cell lines following either PCGF1 or PCGF3 knockout.  
273 Whereas removal of PCGF1 abrogated SS18-SSX presence on chromatin, PCGF3 removal had  
274 no effect. Hence, although PCGF3 is required for synovial sarcoma maintenance, our results  
275 indicate that it does not affect SS18-SSX global chromatin binding suggesting instead an  
276 alternative role for PRC1.3 in this context (**Fig. 4 d, e**). Our data show that PRC1.1 acts as the  
277 main depositor of H2AK119ub1 and is therefore needed for SS18-SSX chromatin binding.

### 278 **SS18-SSX enforces H2AK119ub levels by promoting expression of PRC1.1 components**

279 Interestingly, *BCOR*, a PRC1.1 subunit that regulates complex assembly and activity<sup>66,67</sup>, is  
280 upregulated in synovial sarcoma tumour samples<sup>68,69</sup>, suggesting an interplay between SS18-  
281 SSX and PRC1.1. To investigate this, we looked into published RNA sequencing data where  
282 SS18-SSX1 expression is induced in naïve human fibroblasts (CRL7250)<sup>36</sup>. There, SS18-SSX1  
283 expression resulted in increased *BCOR* and *RYBP* mRNA levels (**Fig. 5a**). Reciprocally, SS18-  
284 SSX knock-down in the two synovial sarcoma cell lines HS-SY-II (SS18-SSX1) and SYO-I  
285 (SS18-SSX2) showed a concomitant decrease in *BCOR* and, to less extent, *RYBP* expression  
286 levels<sup>36</sup> (**Fig. 5b**). Similarly, when we expressed SS18-SSX1 in mesenchymal stem cells or  
287 removed SS18-SSX1 in synovial sarcoma cells, we observed increased or reduced *BCOR* and  
288 *PCGF1* protein levels, respectively (**Fig. 5c, d**). This suggests that SS18-SSX directly regulates  
289 *BCOR* and *RYBP* transcription levels, and indeed both genes are direct targets of the oncofusion  
290 protein (**Fig. 5e**).

291 Consistent with a role for the *BCOR* and *RYBP* subunits in supporting PRC1.1 assembly and  
292 activity<sup>66,67,70</sup>, overexpression of the eGFP-SS18-SSX constructs in synovial sarcoma cells leads  
293 to higher H2AK119ub1 levels in a manner that correlates with the eGFP-fusion expression  
294 levels (**Fig. 5f**). Of note, the same is not observed when expressing an eGFP-only control,  
295 where the H2AK119ub1 staining remains homogeneous regardless of the amount of construct  
296 in the cell. This indicates that SS18-SSX-mediated induction of PRC1.1 components leads to  
297 a detectable increase in H2AK119ub1. Reciprocally, by removing SS18-SSX in synovial  
298 sarcoma cells using an sgRNA against SSX, we also observed a reduction of H2AK119ub1  
299 levels (**Fig. 5g**). Importantly, while SS18-SSX inhibition impacts *PCGF1* protein levels, it does

300 not regulate its transcription (**Fig. 5a, b**). These results indicate that SS18-SSX controls  
301 expression of the PRC1.1 member *BCOR* and is also able to promote PRC1.1 protein levels  
302 via an alternative mechanism.

### 303 **SSX-C increases PRC1.1 stability thus reinforcing H2AK119ub1 levels and SS18-SSX** 304 **occupancy**

305 Since SSX-C does not act as a transcriptional activator (**Fig. 1j**) but directly interacts with  
306 chromatin, we hypothesized that it could augment PRC1.1 protein levels by increasing  
307 stabilization of the complex on chromatin. First, we observed that overexpression of SSX-C  
308 alone is also able to induce *BCOR* levels in synovial sarcoma cells (**Fig. 6a**). Similarly, SSX-  
309 C overexpression in mesenchymal stem cells, recapitulates the increase in *BCOR* levels  
310 (**Extended Fig. 6a**). Of note, SSX-C overexpression does not induce *BCOR* transcription  
311 indicating that this increase occurs at the protein level (**Extended Fig. 6b**). Sequential  
312 chromatin washes in HEK293T cells and chromatin salt extractions in HS-SY-II cells showed  
313 that SSX-C expression increases the presence of the PRC1.1 proteins *BCOR* and *PCGF1* on  
314 the chromatin while decreasing their presence in more soluble fractions (**Fig. 6b, c and**  
315 **Extended Fig 6c**). Such results suggest that SSX-C promotes PRC1.1 protein levels in part by  
316 stabilizing their presence on chromatin. Consistent with a SSX-C-mediated stabilization of  
317 PRC1.1, SSX-C expression strongly correlates with H2AK119ub1 levels in a manner that is  
318 not observed with eGFP or SSX-C mutants (**Fig. 6d, Extended Fig. 6a, d**). Strikingly, by  
319 increasing PRC1.1 stability and H2AK119ub1 levels, SSX-C overexpression also impacts  
320 SS18 levels, which serve as a proxy for SS18-SSX1. This indicates that SSX-C alone is able  
321 to reinforce fusion binding (**Fig. 6e**). Together, these results indicate that SS18-SSX promotes  
322 PRC1.1 activity via transcriptional and SSX-C-mediated mechanisms.

323 To explore the role of wild-type SSX, we investigated whether SSX1 levels are associated with  
324 H2AK119ub1 in human testis where the protein is normally expressed. Publicly available  
325 single-cell RNA sequencing data from human testis shows that SSX1 is expressed in  
326 spermatogonial stem cells, differentiating spermatogonia as well as in early and late  
327 spermatocytes, but not in other testicular cell types (**Extended Fig. 6e**)<sup>71</sup>.  
328 Immunohistochemical staining of human testis revealed that H2AK119ub1 levels are not  
329 homogeneous, rather they are particularly high in cells around the outer edge of the  
330 seminiferous tubules, next to the basal lamina that correspond to spermatogonia (Inhibin-a

331 negative cells) where SSX1 is also specifically detected (**Fig. 6f**). These results suggest that  
332 the physiological role of SSX proteins is also linked to PRC1.1 function.

### 333 **A positive feedback loop promotes H2AK119ub1 levels during synovial sarcoma** 334 **tumourigenesis**

335 The previous *in vitro* results uncovered an autoregulatory feedback loop between SS18-SSX and  
336 PRC1.1, where increased H2AK119ub1 levels reinforce SS18-SSX binding. In light of these  
337 observations, we next assessed if the SS18-SSX oncoprotein promotes H2AK119ub1 *in vivo*. We took  
338 advantage of a synovial sarcoma mouse model in which SS18-SSX2 expression is conditionally-  
339 induced in *Hic1*-positive mesenchymal progenitors<sup>72,73</sup> (**Fig. 7a**). Similar to our observations in cell  
340 culture, SS18-SSX-positive tumour cells (marked by GFP) specifically exhibit high levels  
341 of H2AK119ub1 when compared to normal muscle (**Extended Fig. 7a-c**). Moreover, higher levels of  
342 H2AK119ub1 were clearly detected at earlier time points following SS18-SSX induction, as early as  
343 5 weeks post-induction and with a steady increase that was concomitant with the time course of tumour  
344 formation (**Figure 7b-d**). These results indicate that the SS18-SSX/H2AK119ub1 feedback loop  
345 precedes transformation and underlies synovial sarcoma tumourigenesis *in vivo*.

346 We reasoned that if this autoregulatory feedback loop plays a role in human sarcomagenesis,  
347 increased levels of H2AK119ub1 would be a feature of human synovial sarcomas. To test this,  
348 we performed H2AK119ub immunohistochemistry on a synovial sarcoma tissue microarray of  
349 37 patient samples. H2AK119ub1 exhibited stronger nuclear staining in synovial sarcomas in  
350 comparison to other sarcomas and normal tissues including skeletal muscle (**Fig. 7e, f**). These  
351 results suggest that SS18-SSX activity in human synovial sarcoma also relies on an  
352 autoregulatory feedback loop that translates into high levels of H2AK119ub1 in these tumours.  
353 Taken together, our results uncover a feedback loop in which SS18-SSX/SSX-C and H2A  
354 ubiquitination cooperate to reinforce SS18-SSX presence on the chromatin and therefore its  
355 oncogenic function.

356

## 357 **DISCUSSION**

358 Our study addresses the molecular mechanism underlying SS18-SSX chromatin recruitment  
359 and binding in synovial sarcoma. We demonstrate that the most critical domain of SS18-SSX1  
360 for synovial sarcoma cell maintenance is at the SSX C-terminus where only 34 amino acids  
361 drive binding and maintenance of the oncofusion on chromatin. This highlights the critical role  
362 of the SSXRD domain in the precise recruitment of SS18-SSX at specific synovial sarcoma

363 gene targets and indeed the SSX1 tail alone is able to reproduce SS18-SSX1's genome wide  
364 occupancy in a SSXRD-dependent manner. This is consistent with the finding that some  
365 synovial sarcomas harbour translocations in which SSX1/2 is fused to other alternative partners  
366 such as EWSR1 and MN1<sup>46</sup>. Such occurrences suggest that the SSXRD domain, by mediating  
367 recruitment of transcriptional activators to induce Polycomb target genes during  
368 sarcomagenesis, is the key determinant of a synovial sarcoma signature and that direct de-  
369 regulation of the mSWI/SNF complex through SS18 is not essential to all synovial sarcomas.

370 We also show that SSXRD binds chromatin environments rich in H2AK119ub1 and histones  
371 MacroH2A. Intriguingly, SSXRD is also present in PRDM9, a DNA binding protein critical in  
372 delineating homologous recombination hotspots during meiosis via H3K4me3 deposition<sup>74-76</sup>.  
373 Recent work showed that removing SSXRD in PRDM9 led to a complete loss of H3K4me3  
374 deposition at PRDM9 hotspots<sup>77</sup> potentially suggesting a role of SSXRD in driving PRDM9  
375 chromatin localisation as well.

376 Our data supports the idea that H2AK119ub1 is important for SS18-SSX specific chromatin  
377 targeting<sup>48</sup>, and further shows that in synovial sarcoma, PRC1.1 is central in establishing  
378 H2AK119ub deposition and therefore oncofusion protein occupancy and maintenance. Hence,  
379 PCGF1 removal leads to a global erosion in SS18-SSX binding. These results support a role  
380 for PRC1.1 as the main contributor of genome-wide H2AK119ub1 deposition as observed in  
381 mouse embryonic stem cells<sup>10</sup>, and suggest that other variant PRC1 complexes may have  
382 alternative roles in synovial sarcoma. Moreover, we show for the first time that PRC1.1 activity  
383 can deposit histones MacroH2A alongside H2AK119ub1. Removing MacroH2A did not  
384 impact H2AK119ub1 deposition indicating that deposition of the histone variant occurs  
385 downstream of the establishment of the histone mark. Interestingly, in synovial sarcoma cells,  
386 this occurs independently of PRC2 which was so far the only complex thought to regulate  
387 MacroH2A deposition<sup>65</sup>.

388 Our data also revealed a strong interplay between SS18-SSX and PRC1.1 activity leading to a  
389 positive feedback loop that results in increased H2AK119ub1 in murine and human synovial  
390 sarcomas. Two distinct mechanisms mediate this interplay. On one hand SS18-SSX binds to  
391 and positively regulates the transcriptional level of PRC1.1 genes, *BCOR* and *RYBP*. On the  
392 other hand, the SSX C-terminus induces an increase in H2AK119ub1 by stabilizing the PRC1.1  
393 complex levels and chromatin binding. Both simultaneously act to further promote SS18-SSX  
394 presence on the chromatin (**Fig. 8**) thereby reinforcing its oncogenic activity. This model is in

395 agreement with a previous study showing that RYBP occupancy is induced by SS18-SSX  
396 expression in murine mesenchymal stem cells<sup>78</sup>. The feedback loop we identified is also  
397 reminiscent of the role of RYBP in the PRC1 complex, where it both promotes interactions  
398 within the complex leading to increased complex stability<sup>70</sup> and recognizes and binds  
399 H2AK119ub1-modified nucleosomes to further promote H2AK119ub1 deposition<sup>79</sup>. This  
400 work further sheds light onto the central role that PRC1 activity, and its derivative H2AK119ub1  
401 histone mark, plays in driving and sustaining synovial sarcoma and supports inhibition of  
402 PRC1.1 as a potential therapeutic strategy.

403 These findings are also important in light of a putative role of full length wild-type SSX family  
404 proteins, which have been reported to be expressed in synovial sarcomas<sup>32,80</sup>, in further  
405 promoting oncofusin protein activity. Moreover, SSX proteins are cancer-testis antigens that  
406 are abnormally present in various cancers such as melanoma, breast and prostate cancer<sup>81,82</sup>.  
407 Therefore, the interplay between SSX and H2AK119ub1 could impact a wider range of other  
408 malignancies.

409 Our study describes a central role for H2AK119ub1 in driving synovial sarcoma and in doing  
410 so it highlights a key role for PRC1 beyond cell fate decisions and development, which is  
411 further supported by the occurrence of main driving genetic events involving *BCOR* in several  
412 pediatric tumours<sup>24-29</sup>. Further studies will uncover to what extent “PRC1-dependent” tumours  
413 share molecular characteristics and circuitries that can be exploited therapeutically.

414

## 415 **METHODS**

### 416 **Cell Culture**

417 Human synovial sarcoma cell lines: HS-SY-II (RRID:CVCL\_8719)<sup>83</sup> and SYO-1  
418 (RRID:CVCL\_7146)<sup>84</sup> were obtained from their original source laboratories. Human  
419 osteosarcoma KHOS-240S (RRID:CVCL\_2544) and Human Embryonic Kidney HEK293T  
420 (RRID:CVCL\_0063) were purchased from the American Type Culture Collection (ATCC).  
421 Cells were cultured in DMEM (Gibco) supplemented with 10% Fetal Bovine Serum.  
422 ASC52telo, hTERT immortalized adipose derived Mesenchymal stem cells were purchased  
423 from ATCC (SCRC-4000) and were cultured in MesenPRO RS™ Medium (Gibco, 12746-  
424 012) supplemented with L-glutamine (Sigma-Aldrich, G7513-100ML) at a final concentration  
425 of 2 mM.

## 426 **Virus Production and transduction**

427 For lentivirus production,  $1 \times 10^6$  HEK293T cells were transfected with  $3 \mu\text{g}$  constructs and  
428 helper vectors ( $2.5 \mu\text{g}$  psPAX2 and  $0.9 \mu\text{g}$  VSV-G). For retroviral infection,  $10 \times 10^6$  293T-gag-  
429 pol cells were transduced with  $20 \mu\text{g}$  of MSCV vectors and  $2.5 \mu\text{g}$  of VSV-G. Transfection of  
430 packaging cells was performed using polyethyleneimine (Polysciences, 23966-2) by mixing  
431 with DNA in a 3:1 ratio. Viral supernatants were collected 48h after transfection, filtered  
432 through a  $0.45 \mu\text{m}$  filter and supplemented with  $4 \mu\text{g}/\text{ml}$  of polybrene (Sigma) before adding  
433 to target cells. Downstream experiments using sgRNAs knockout were performed 10 days after  
434 sgRNA induction (CUT&RUN, RNA sequencing) or 12 days after knockout  
435 (Immunofluorescence). Downstream experiments using eGFP or MBD constructs (Salt  
436 Extraction, Imaging, Nuclear co-IP) were performed 6 days after induction.

## 437 **Generation of Cas9 stable cell lines**

438 For stable expression, HS-SY-II and SYO1 synovial sarcoma cell lines were transduced with  
439 lentiCas9-Blast<sup>85</sup> (Addgene, #52962) and selected using  $20 \mu\text{g}/\text{ml}$  of blasticidin to generate  
440 stable Cas9-expressing cell lines. Cells were consequently transduced with sgRNAs and  
441 selected with puromycin. For inducible expression HS-SY-II and SYO1 were transduced with  
442 a lentivirus expressing the reverse tetracycline-controlled transactivator (rtTA3), the ecotropic  
443 receptor (EcoRec) and a hygromycin resistance gene (pRRL-SFFV-rtTA3-IRES-EcoR-PGK-  
444 hygro, a gift from Johannes Zuber). Transduced cells were selected with  $40 \mu\text{g}/\text{ml}$  hygromycin  
445 (Invitrogen). Selected cells were next transduced with a lentivirus expressing Cas9 and BFP  
446 (Blue Fluorescent Protein) under regulation of tetracycline-responsive element promoter  
447 (pRRL-TRE3G-Cas9-P2A-BFP, a gift from Johannes Zuber). Cas9 and BFP expression  
448 induction was achieved by treatment of the cells for 3 days with doxycycline (Dox) ( $1 \mu\text{g}/\text{ml}$ )  
449 (Hyclate, Alfa Aesar) and single cell clones were seeded by sorting BFP positive cells using  
450 the BD FACSAria™ Cell Sorter system. To measure Cas9 efficient and leakiness, HS-SY-II  
451 and SYO1 Dox inducible Cas9 single cell clones were transduced with a sgRNA against the  
452 surface molecule CD46 (pLKO-U6sgRNA\_CD46\_improved-EF1s-GFP-P2A-Puromycin)  
453 (sgRNA CD46: 5'-GGAGTACAGCAGCAACACCA-3') as described in<sup>86</sup>. Inducible Cas9  
454 expression was activated for 6 days using doxycycline to remove SSX or PCGF1 when  
455 applicable.

456

## 457 **Plasmid Cloning**

458 sgRNA for CRISPR knock-out were designed using Sanjana lab tool  
459 (<http://guides.sanjalalab.org/>) and cloned as previously described<sup>38,85</sup> (see Table S1 for sgRNA  
460 sequences). Briefly, sgRNAs were cloned by annealing two DNA oligos and ligating into a  
461 BsmB1-digested pLKO1-puro-U6-sgRNA-eGFP. Transformation was carried into Stbl3  
462 bacteria. eGFP constructs were cloned into pLV-EF1a-IRES-Neo lentiviral backbone<sup>87</sup>  
463 (Addgene, #85139) containing a Neomycin selection cassette. cDNAs were adapted from the  
464 MSCV-HA-PGK-Puro plasmids<sup>23</sup>. For the SSX fusion vectors, cDNA of EWSR1 and MN1  
465 were obtained from the DKFZ cDNA clone repository and assembled with an HA-tag at the  
466 N-terminus and SSX at the C-terminus into a MSCV-PGK-Puro backbone in a single step using  
467 NEBuilder HiFi DNA Assembly (NEB, #E2621).

468 NanoBRET plasmids pHTN-HaloTag-CMV-neo (Promega, G7721) and pNLF1-N-CMV-  
469 Hygro (Promega, N1351) were obtained from Promega. Histone H2A cDNA were PCR  
470 amplified from pCDNA3.1-Flag-H2A and pCDNA3.1-Flag-H2A K118-119R<sup>51</sup> (Addgene,  
471 #63560, #63564). Histones Macro-H2A cDNAs were obtained for the DKFZ cDNA clone  
472 repository.

473 MBD-V5 constructs were cloned into pLV-EF1a-IRES-Neo. Luciferase was amplified by PCR  
474 from pT3-EF1a-NrasG12V-GFP-P2A-Luc2 (a gift from Scott Lowe's laboratory), KDM2B  
475 was amplified from pUC19-hKDM2B (Sino Biological, HG20918-U) and the ZF-CxxC  
476 mutant was generated with PCR using mismatched primers (Q5). The MBD sequence was  
477 amplified using pENTR-MBD1<sup>88</sup> (Addgene, #47057) as template. The assembly was designed  
478 and performed in a single step adding the MBD, the cDNAs and V5-NLS using NEBuilder  
479 HiFi DNA Assembly.

## 480 **Cell Competition Assays**

481 HS-SY-II and KHOS-240S Cas9 cells were transduced with an empty plasmid (Empty Vector),  
482 plasmid containing sgRNA targeting PCGF1, or sgRNA targeting both MacroH2A. Infections  
483 were done with a virus dilution of 1:10 to obtain an infection efficiency of around 70-80%.  
484 Infected cells become GFP+ due to the backbone of the sgRNA. The cells were then cultured  
485 over a period of 25 days, and the percentage of GFP+ cells measured using a Fortessa FACS  
486 machine. Data was analysed using Flowjo software.

487



## 488 **CRISPR/Cas9 gene-tilling screen**

489 sgRNAs library cloning and screen deconvolution were performed as previously described<sup>89,90</sup>.  
490 Briefly, sgRNAs targeting the entire coding sequence of SS18 and SSX1 were designed  
491 using <http://crispr.mit.edu/> and Benchling (<https://benchling.com>) and cloned into pLKO-U6-  
492 sgRNA-improved-EF1s-GFP-P2A (gifted by Darjus F Tschaharganeh). 211 sgRNA were  
493 designed spanning the length of the isoform 1 of SS18 (NT 010966) and 90 sgRNA targeting  
494 isoform 1 of SSX1 (NT 011568). Additionally, 200 safe sgRNA were added as negative  
495 controls; these guides target the non-genic region of genome<sup>91</sup>. Stable Cas9-expressing cell  
496 lines were transduced to about 30% efficiency. After 3 days of infection, cells were selected  
497 with 2µg/ml of puromycin. Cells were passaged with the number of cells kept at 3000 times  
498 the size of the library, i.e., at least 1.56x10<sup>6</sup> cells were passaged. After 15 population doublings  
499 the cells were harvested, and their genomic DNA was extracted using phenol extraction  
500 method. The region spanning the sgRNA was amplified via using custom primers. Amplicons  
501 were sent for next generation sequencing using NextSeq 550 SR 75 HO. Files were  
502 demultiplexed and counts were mapped on the library using Mageck tool. To identify  
503 individual regions which are more important for cell survival, ProTiler tool was used to identify  
504 CKHS (CRISPR Knockout Hyper-Sensitive) regions were identified.

## 505 **Live Imaging**

506 30 000 HEK293T cells transduced with the various eGFP constructs were seeded in an 8 well  
507 chamber slide (µ-Slide 8 Well high, Ibidi). Cells were then imaged within the next 48h using  
508 Leica TCS SP5 inverted Confocal with the HCX PL APO 63x/1.40-0.60 Oil Lbd BL objective,  
509 a single z-stack was captured. DNA was stained 30 minutes prior image acquisition using  
510 NucBlue Live ReadyProbes Reagent (Hoechst 33342) (Invitrogen).

## 511 **Immunofluorescence staining**

512 Between 0.5x10<sup>6</sup> to 1x10<sup>6</sup> cells were seeded 6 days after induction in 6-well plates containing  
513 coverslips. Cells were fixed the following day with 4% paraformaldehyde for 10 minutes.  
514 Permeabilization was performed using TritonX (0.1 % in PBS) for 12 min followed by  
515 incubation with blocking solution (1% BSA, 0.1% Gelatin Fish in PBS) for 1 hour. Incubation  
516 with the primary antibody was performed in blocking buffer for 1 hours at RT. Cells were  
517 washed, incubated with secondary antibodies for 1h and mounted in Vectashield Antifade  
518 Mounting Medium containing DAPI (Vectorlabs). For 4-color immunofluorescence using V5-

519 555 antibody (Invitrogen), after the secondary antibody, cells were washed and incubated with  
520 V5-555 for 1h prior to mounting. Antibodies used are listed in Table S2.

## 521 **Image Capture and Analysis**

522 Confocal images were acquired on Leica TCS SP5 inverted Confocal using the HCX PL APO  
523 63x/1.40-0.60 Oil Lbd BL objective, a single z-stack was captured. Samples were imaged using  
524 405, 488, 561, 594 and 633nm laser lines using sequential mode in the Leica Application Suite  
525 software. For illustration, samples were imaged using a 512x512 format at a 100Hz speed using  
526 line averaging at 4 with a zoom factor of 11. Images were then smoothed and adjusted for  
527 brightness and contrast using the ImageJ/Fiji software. For MBD foci quantifications, images  
528 were acquired using a 512x512 format at a 700Hz speed with a zoom factor of 1.7. Between  
529 50 and 100 foci were counted per replicate, each MBD foci was selected, and only co-occurring  
530 foci were counted.

531 For H2AK119ub, BCOR and SS18 signal intensity quantifications in eGFP induced cells,  
532 nuclei were detected and selected using Li's thresholding on ImageJ/Fiji software. Signal  
533 intensity for each selected nuclei was measured for all the channels (405-DAPI, 488-eGFP,  
534 594- H2AK119ub /BCOR/SS18 and 647-H2AK119ub when applicable). The corrected mean  
535 intensity of the 488, 594 and 647 channel was calculated by dividing the mean signal intensity  
536 of each nucleus by its corresponding mean DAPI intensity to normalize the signals. eGFP  
537 signals were separated in two groups, low eGFP (corrected mean intensity <1) and high eGFP  
538 (corrected mean intensity > 1). In the low and high eGFP group, the average of the corrected  
539 mean intensity of the 594 and 647 channels was calculated. Finally, the ratio of the high versus  
540 low was used to display the change in signal intensity in the high eGFP population (Average  
541 of the corrected mean intensity<sub>high eGFP</sub> / Average of the corrected mean intensity<sub>low eGFP</sub>). For  
542 each biological replicates, between 50 and 250 nuclei were analyzed.

## 543 **Mouse Model for conditional SS18-SSX2 expression**

544 The mouse model of synovial sarcoma used herein (Scott et al., unpublished data) is based on  
545 the hSS2 model with a conditional SS18-IRES-eGFP allele knocked into the Rosa26 locus<sup>72,73</sup>.  
546 Animals were maintained and experimental protocols were conducted in accordance with  
547 approved and ethical treatment standards of the Animal Care Committee at the University of  
548 British Columbia.

549

550 *Tissue processing and staining*

551 To enable detection of native eGFP expression in processed tissue samples, mice at clinical  
552 endpoint were humanely euthanized by intraperitoneal injection of Avertin (400 mg/kg) and  
553 the tongues were removed. Wild type tongue samples were obtained from age matched Cre  
554 negative control animals. Dissected tongues were immersed in 2% paraformaldehyde fixative  
555 for 48 hrs at 4°C. Samples were then washed 3 x 30 mins in PBS and then immersed through  
556 a gradient of sucrose solutions from 10%-50% at 4°C for > 4 hrs each before being embedded  
557 in cryomolds (Polysciences 18646A) using OCT (Sakura Finetek, 4583) and frozen in an  
558 isopentane bath cooled by liquid nitrogen. Cryosections were cut (Leica CM3050S) at a  
559 thickness of 20 um and mounted onto Superfrost Plus slides (VWR 48311-703). Slides were  
560 thawed at 37°C for 30 mins, washed 3 x 10 mins in PBS and incubated for 1 hr in PBS  
561 containing 10 mg/mL sodium borohydride (Sigma 213462) to quench autofluorescence.  
562 Following this treatment, slides were briefly washed with PBS and incubated in block solution  
563 containing 2.5% BSA (Sigma A7030) and 2.5% Goat serum (Gemini 100-190) for 90 min at  
564 room temperature prior to incubation in primary antibody dissolved in block solution (1:100),  
565 overnight at 4°C. Primary antibody solution was removed and slides were washed 3 x 5 mins  
566 in PBS before Alexa Fluor conjugated secondary antibodies were applied to the slides for 45  
567 min. After secondary antibody incubation, 3 x 5 min PBS washes were performed and sections  
568 were counterstained with DAPI (600 nM in PBS) for 5 mins, rinsed and mounted with Aqua  
569 Polymount (Polysciences 18606).

570 *Image acquisition and quantification*

571 Confocal images were collected using a Nikon Ti-E inverted microscope with an A1R HD25  
572 confocal scanning head and acquired in Nikon Elements software. For quantification, a single  
573 z-stack was selected and the image was first smoothed. Nuclei were detected using Li's  
574 thresholding on ImageJ/Fiji software. Signal intensity for each selected nuclei was measured  
575 for the channels 405-DAPI, 488-eGFP (SSM2 cassette) and 647-H2AK119ub. The ratio  
576 intensity of H2AK119ub1 over DAPI was calculated by dividing the 647 mean signal intensity  
577 over its corresponding 405 mean signal intensity.

578 **Human testis immunohistochemical imaging**

579 For immunohistochemical analyses, formalin-fixed and paraffin embedded (FFPE) tissue  
580 samples of non-neoplastic human testis were retrieved from the archives of the Institute of

581 Pathology, University Hospital Heidelberg, Heidelberg, Germany. Use of patient samples was  
582 approved by the ethics committee of the University of Heidelberg (S-442/2020). Four  $\mu\text{m}$   
583 sections were cut and mounted on SuperFrost Plus Adhesive slides (Thermo Scientific),  
584 followed by deparaffinization and heat induced antigen retrieval (97 degree celcius) in high pH  
585 buffer (pH 9) for 30 minutes. Primary monoclonal mouse antibodies for Inhibin  $\alpha$  (ready to  
586 use, clone R1, Dako Omnis, Agilent, Glostrup, Denmark), SSX (dilution 1:100) and  
587 H2A119ub1 (dilution 1:500) listed in Table S2 were each incubated for 25 minutes.  
588 Visualization was performed using the ready to use Polyview Plus HRP (anti-mouse) reagent  
589 (Enzo Life Sciences, Farmingdale, USA). Sections were counterstained with hematoxylin.

### 590 **Human synovial sarcoma tissue microarray immunohistochemical imaging**

591 H2AK119Ub and SS18-SSX immunohistochemistry were performed on a 4  $\mu\text{m}$  section of a  
592 formalin-fixed, paraffin-embedded human tissue microarray (TMA) consisting of: 37 synovial  
593 sarcoma cases; 1 case each of epithelioid sarcoma, sarcomatoid mesothelioma, Ewing sarcoma,  
594 sarcomatoid renal cell carcinoma, clear cell sarcoma, dedifferentiated liposarcoma, and myxoid  
595 liposarcoma, as well as normal skeletal muscle, ovarian stroma, breast glandular tissue, and  
596 testis controls from Vancouver General Hospital. Cases were included as 0.6 mm patient  
597 sample cores in duplicate. The assays were run with the following conditions, via a Leica Bond  
598 RX (Leica Biosystems, Buffalo Grove, IL, USA). Heat-induced epitope retrieval was  
599 performed using citrate-based BOND Epitope Retrieval Solution 1 (Leica Biosystems, Buffalo  
600 Grove, IL, USA) for 10 min, 10 min, and 20 min, respectively. The primary antibodies  
601 H2AK119Ub (Cell Signaling Technology, #8240, Danvers, MA, USA), and SSX-SS18 (Cell  
602 Signaling Technology, #72364S, Danvers, MA, USA) were incubated at 1:400 for 30 min and  
603 1:300 for 15 min, respectively, at ambient temperature. Staining was visualized using the  
604 BOND Polymer Refine Detection kit (Leica Biosystems, DS9800, Buffalo Grove, IL, USA),  
605 which includes a 3,3'-diaminobenzidine (DAB) chromogen and hematoxylin counterstain.  
606 TMA virtual slide scans were then generated on a Leica Aperio AT2 (Leica Biosystems,  
607 Buffalo Grove, IL, USA) at 40x magnification. Each individual patient sample core was  
608 analysed using HALO and HALO AI (Indica Labs), which required user annotated training  
609 data to develop an artificial intelligence segmentation network for nuclear identification. The  
610 TMA module was implemented to extract individual patient core images from the TMA whole  
611 slide scan. The Multiplex IHC module was trained to identify DAB staining using  
612 representative pixels for delineation from hematoxylin in order to determine average DAB  
613 nuclear optical density.

## 614 **NanoBRET**

615 NanoBRET Protein:Protein Interaction assay was performed following the manufacturer's  
616 conditions (Promega, N1662).  $0.5 \times 10^6$  HEK293T cells were plated the day before transfection  
617 in a 12 well plate. 2 $\mu$ g of HaloTag plasmid (empty, SS18, SS18-SSX, SSX-C, SSX-C <sup>$\Delta$ RD</sup> or  
618 SSX-C<sup>E184\*</sup>) + 0.2 $\mu$ g of NanoLuc plasmid (H2A WT, H2A<sup>K118K119R</sup>, MacroH2A1.2 or  
619 MacroH2A2) were transfected using polyethylenimine by mixing with DNA in a 3:1 ratio. 48h  
620 after transfection, cells were counted and adjusted to a final concentration  $2 \times 10^6$  cells/ml. Cells  
621 were passed in a 96-well white plate. For each condition, 10 $\mu$ l (20000 cells) were seeded in 4  
622 different wells. Each well was supplemented with 90 $\mu$ l of Opti-MEM I Reduced Serum  
623 Medium, no phenol red (Gibco, 11058-021) containing 4% FBS with either 100nM HaloTag  
624 NanoBRET 618 Ligand (+ ligand, experimental samples in 2 technical replicates) or 0.1%  
625 DMSO final concentration (- ligand, no-acceptor controls in 2 technical replicates). The next  
626 day, 72h post transfection, 25 $\mu$ l of 5X NanoBRET Nano-Glo in Opti-MEM I Reduced Serum  
627 Medium was added on all the wells. Measurements of NanoBRET bioluminescent donor  
628 emission (460nm) and acceptor emission (618nm) were performed within 10 minutes of  
629 substrate addition using a PHERAstar Microplate Reader (BMG LABTECH) using 450nm and  
630 620nm filters. NanoBRET calculations were done using the followings steps: the raw  
631 NanoBRET ratio (BU) was obtained by dividing the acceptor emission value (620nm) by the  
632 donor emission value (450nm) for each sample. BU were then converted to milliBRET units  
633 (mBU) by multiplying each raw BRET value by 1000. The final BRET ratio (mBU) displayed  
634 in the figures is calculated for each biological replicate by subtracting the mean of the two  
635 experimental replicates (+ ligand) with the mean of the two no-ligand control replicates (-  
636 ligand).

## 637 **Chromatin Salt Extraction/Sequential chromatin washes**

638 Chromatin salt extraction was adapted from Herrmann et al<sup>44</sup>. Approximately  $10 \times 10^6$  cells  
639 were harvested and washed twice in PBS. Cell pellets were then washed in a series of chromatin  
640 salt extraction buffers containing 0.1% Triton X, 300mM Sucrose, 1mM MgCl<sub>2</sub>, 1mM EGTA,  
641 10mM PIPES and NaCl at increasing concentrations: 80mM, 150mM, 300mM or 500mM. All  
642 buffers were supplemented with protease inhibitors (Protease inhibitor tablets, Roche). Cell  
643 pellets were resuspended and incubated in 50 $\mu$ l of chromatin salt extraction buffer for 10 min  
644 at room temperature and pelleted at 2000g for 5 min. The supernatant was transferred to a new  
645 tube and supplemented with 2X Laemmli (Invitrogen) and kept on ice after a 5-minute

646 denaturation step at 95°C. For the chromatin extraction after the last 500mM wash, pellets were  
647 resuspended in 500mM NaCl chromatin salt extraction buffer supplemented with 2X Laemmli.  
648 The chromatin sample was then denatured at 95°C for 5 minutes and sonicated. Chromatin  
649 samples were then centrifuged at full speed for 5 minutes to get rid of the DNA debris and  
650 transferred to a new tube. Sequential chromatin washes were performed similarly but the cells  
651 and the chromatin were washed at constant salt concentration of 150mM for 4 washes, the  
652 chromatin fraction was then sonicated as above. Samples were then used for Western Blotting.  
653 The signal intensity in the various salt fraction was measured using the maximum intensity of  
654 a square containing the band in the ImageJ/Fiji software. The total protein level was calculated  
655 using the sum of the maximum intensity as a proxy. Each intensity/salt fraction was then  
656 represented as a percentage of total protein levels.

### 657 **Histone Acid Extraction**

658 Approximately  $1 \times 10^6$  cells were harvested and washed twice in PBS. Cells were resuspended  
659 in 100µl PBS + 0.5% Triton-X and incubated for 10 min on ice. After centrifugation at 6,500g  
660 for 10 min at 4°C, nuclei were washed a second time in 100µl PBS + 0.5% Triton-X. Nuclear  
661 pellets were then resuspended in 25µl of 0.2 N HCl. Histones were released overnight at 4°C  
662 and DNA debris pelleted at 6,500 g for 10 min at 4°C. Histone acid extracts were neutralised  
663 with 2.5µl of 2M NaOH. After 2X Laemmli addition and denaturation at 95°C for 5 minutes,  
664 samples were loaded onto a Western Blot gel.

### 665 **Whole cell protein extracts & Western Blotting**

666 Cells grown in 6-well plates were harvested and washed in PBS. Cell pellets were incubated  
667 with RIPA buffer (Cell Signaling) supplemented with protease inhibitors (Roche) for 30 min  
668 and cleared by centrifugation (15 min 14.000 rpms 4C). Protein lysates were quantified using  
669 a BCA protein assay (Pierce). Lysates were then denatured in 2X Laemmli at 95°C for 5  
670 minutes and run in Mini-PROTEAN Precast Gels (BioRad) and transferred onto membranes  
671 using Trans-Blot Turbo. Membranes then were blocked in 5% milk in TBST. Western were  
672 visualized using Amersham Imager 680.

### 673 **Nuclear Immunoprecipitation**

674 Approximately  $5 \times 10^7$  cells were harvested and washed twice in PBS. Nuclei isolation,  
675 nuclear fraction digestion and collection was performed using Nuclear Complex Co-IP Kit  
676 (Active Motif, 54001). 25µl per IP of GFP-Trap Magnetic Agarose beads (Chromotek) were

677 washed twice in 1X IP Low buffer supplemented with protease inhibitor and PMSF following  
678 manufacturer's guidelines (Active Motif, 37511). 200µl of nuclear extracts were incubated  
679 with the GFP-Trap beads for 1hour at 4°C. Beads were then washed three times in 1X IP Low  
680 buffer and resuspended in 100µl of 1% SDS. Beads were denatured at 95°C for 5 minutes and  
681 the supernatant was submitted for mass spectrometry at the EMBL Proteomics Core Facility.  
682 Data analysis was performed by the Facility. The raw output files of IsobarQuant (protein.txt  
683 – files) were processed using the R programming language. Only proteins that were quantified  
684 with at least two unique peptides were considered for the analysis. Raw signal-sums  
685 (signal\_sum columns) were first cleaned for batch effects using limma<sup>92</sup> and further normalized  
686 using variance stabilization normalization<sup>93</sup>. Different normalization coefficients were  
687 estimated for control conditions in order to maintain the lower observed abundance.

### 688 **Chromatin Immunoprecipitation (ChIP)**

689 HA-tag ChIP on HS-SY-II cells expressing MSCV-HA-eGFP-PGK-Puro, MSCV-HA-eGFP-  
690 SSX-C-PGK-Puro or MSCV-HA-eGFP-SSX-C<sup>ARD</sup>-PGK-Puro was performed following  
691 puromycin selection and collected 6 days following transduction. HS-SY-II cells were pre-  
692 fixed for 20 minutes with 1.5mM ethylene glycol bis(succinimidyl succinate) (Thermo  
693 Scientific) and then fixed with 1% formaldehyde for 15min and the cross-linking reaction was  
694 stopped by adding 125mM of glycine. Cells were washed twice with cold PBS and lysed in  
695 swelling buffer (150mM NaCl, 1%v/v Nonidet P-40, 0.5% w/v deoxycholate, 0.1% w/v SDS,  
696 50mM Tris pH8, 5mM EDTA) supplemented with protease inhibitors. Cell lysates were  
697 sonicated using a Covaris E220 Sonicator to generate fragments less than 400 bp. Sonicated  
698 lysates were centrifuged and incubated overnight at 4°C with HA-tag Abcam 9110.  
699 Immunocomplexes were recovered by incubation with 30ul protein A/G magnetic beads  
700 (Thermofisher) for 2h at 4°C. Beads were sequentially washed twice with RIPA buffer and  
701 finally TE buffer.

### 702 **Cleavage Under Targets and Release Using Nuclease (CUT&RUN)**

703 SS18-SSX, H2AK119ub1 and MacroH2A2 occupancy was assayed using CUTANA  
704 ChIC/CUT&RUN Kit (EpiCypher, 14-1048) following manufacturer's protocol. Briefly, 0.5  
705 million human synovial sarcomas cells (HS-SY-II or SYO-I) were harvested per sample and  
706 bound to activated Concanavalin A magnetic beads. Beads were then incubated at 4°C  
707 overnight with 1:50 dilution of antibodies per sample. Chromatin digestion was performed for  
708 2 hours at 4°C. Digestion is then stopped by chelating Ca<sup>++</sup> ions in a buffer containing *E.coli*

709 DNA for Spike-in. DNA Fragments are then released in solution after a 10 min incubation at  
710 37°C on a ThermoMixer at 500 rpm. DNA Fragments were then purified using CUTANA DNA  
711 Purification Kit (EpiCypher).

## 712 **Library preparation**

713 DNA fragments obtained after ChIP or CUT&RUN were quantified using Qubit dsDNA HS  
714 Assay Kit (Invitrogen). 5ng of DNA was used for library preparation using NEBNext Ultra II  
715 DNA Library Prep Kit for Illumina (NEB, E7645S), SPRIselect beads (Beckman Coulter,  
716 #B23317) and NEBNext Multiplex Oligos for Illumina (NEB, Set 1 #E7335S, Set 2 #E7500S).  
717 ChIP libraries were done following NEB's guidelines (NEB, E7645S), CUT&RUN libraries  
718 were done following CUTANA ChIC/CUT&RUN Kit (EpiCypher, 14-1048) adapted protocol.  
719 ChIP libraries were sequenced as 75 bp Single-Read on Illumina NextSeq 550 platform High-  
720 Output. CUT&RUN libraries were sequenced as 75 bp Paired-End reads on Illumina NextSeq  
721 550 platform Mid-Output.

## 722 **ChIP-seq Analysis**

723 SS18-SSX1 (HA) input (SRR6451607), SS18-SSX1 (HA) IP (SRR6451595), KDM2B input  
724 (SRR6451587) and KDM2B IP (SRR6451586) were obtained from deposited GEO under the  
725 accession number GSE108926. Raw reads were trimmed for quality and Illumina adapter  
726 sequences using trim-galore, then aligned to the human genome assembly hg38 using Bowtie  
727 2<sup>94,95</sup> (with "--very-sensitive" option). ChIP signals were normalised to their respective inputs  
728 using the pileup function from MACS2<sup>96,97</sup> using corresponding input for background  
729 normalization. To visualize ChIP-Seq tracks, normalized bigWig files were generated with  
730 ucsc-wigtobigwig tool. HA-SS18-SSX1 peaks (n=26805) were generated with the MACS2  
731 function (with "--no model", "--qvalue 0.05", "--broad" options) and normalized to input.

## 732 **CUT&RUN Analysis**

733 Paired-end reads were aligned to the hg38 and *E.coli* K12, MG1655 reference genome using  
734 Bowtie 2 (with options for hg38: --local --very-sensitive-local --no-unal --no-mixed --no-  
735 discordant --phred33 -I 10 -X 700 and for K12 --end-to-end --very-sensitive --no-overlap --no-  
736 dovetail --no-mixed --no-discordant --phred33 -I 10 -X 700). To internally calibrate our  
737 CUT&RUN experiments, we used the exogenous *E.coli* genome to quantitatively compare the  
738 genomic profiles as previously described<sup>98</sup>. We first calculated the percentage of spike-in reads  
739 that align uniquely. We then normalized the sequencing depth (x% of spike-in reads in total



740 reads) using the scaling factor so that *E. coli* spike-in signal is set to be equal to 1 across all  
741 samples: scaling factor = 1/ x% spike-in reads in total reads.

742 Genome coverage files were generated using bamCoverage<sup>99</sup> with 50bp bins, no normalisation  
743 and scaled (--scaleFactor). When applicable, correlation of replicates was confirmed using  
744 deeptools functions multiBigwigSummary and plotCorrelation<sup>99</sup>. For peak calling, the MACS2  
745 callpeak function was used on the aligned BAM files (with "--nomodel", "--pvalue 0.001", "--  
746 broad" options, "--keep-dup all").

747 Heatmap of Spearman correlation coefficients from coverages were computed over CpG  
748 islands UCSC track from bigWig files using deeptools multiBigwigSummary and  
749 plotCorrelation<sup>99</sup>.

## 750 **ChIP and CUT&RUN Data Visualisation**

751 Genome tracks were visualized using WashU Epigenome Browser. For heatmaps and metaplot  
752 profiles read densities of the various IPs were centered around SSX peaks (ChIP), HA-SS18-  
753 SSX1 peaks for HS-SY-II (replicates pooled together, n=52027) or SS18-SSX2 peaks for  
754 SYO-I (n=61940). A +/- 5 kb window from peak center was aligned and binned with 50 bp  
755 using computeMatrix and plotProfile/plotHeatmap functions from deeptools<sup>99</sup>.

## 756 **Human single cells testis Atlas**

757 tSNE plots were obtained from the Human Testis Atlas Browser by Cairns Lab<sup>100</sup>.  
758 <https://humantestisatlas.shinyapps.io/>. Data was acquired on young adults 17, 24 and 25 years  
759 old.

## 760 **Data availability**

761 HA-SS18-SSX1 and KDM2B ChIP sequencing data re-analysed in Figure 1 originates from  
762 GEO accession number GSE108929. The GEO accession number for the ChIP-Seq and  
763 CUT&RUN-Seq data reported in this paper is GSE205955.

764

## 765 **CONFLICTS OF INTEREST**

766 The authors declare no competing interests.

767

## 768 **AUTHORS' CONTRIBUTIONS**

769 N.S.B. conceived the study, designed, performed, and analysed the experiments, and wrote the  
770 manuscript. V.D. generated the Cas9 cell lines, conducted the CRISPR/Cas9 screen, the  
771 competition assays and assisted with the CUT&RUN experiments. R.S.W and T.M.U provided  
772 the mouse model data. F.K.F.K. performed immunohistochemistry analysis of human testis.  
773 A.S, A.P, L.G., L.W .assisted in experiments and reagents production. F.J.S-R. assisted with  
774 CRISPR/Cas9 library cloning and screen deconvolution. M.T., S.T. and T.O.N. provided the  
775 analysis for the synovial sarcoma tissue microarrays. A.B. conceived and coordinated the study  
776 and wrote the manuscript. All authors read and approved the final manuscript for publication.

777

## 778 **ACKNOWLEDGEMENTS**

779 We thank Wei He from Han Xu's laboratory for help in running ProTiler analysis for the *SS18-*  
780 *SSX1* gene-tilling screen. Scott W. Lowe, Darjus Tschaharganeh, Johannes Zuber and Steven  
781 Henikoff for sharing reagents and protocols. Deepti Talwar from the Tobias Dick group at the  
782 DKFZ for assistance in measurements for the NanoBret assays. The EMBL Mass Spectrometry  
783 Facility members Mandy Rettel and Frank Stein for sample processing and data analysis. We  
784 also thank Robert Illingworth and Christopher Playfoot for their useful comments and  
785 discussion regarding the manuscript and members of the paediatric soft-tissue sarcoma lab and  
786 the U54 Synovial Sarcoma consortium for feedback and fruitful discussions. This project has  
787 received funding from the European Research Council (ERC) under the European Union's  
788 Horizon 2020 research and innovation programme (grant agreement n° 805338) (A.B.) and  
789 from the National Institutes of Health/National Cancer Institute (NIH/NCI) U54CA231652  
790 (T.O.N., T.M.U. and A.B.). T.O.N. and T.M.U. were additionally supported by grants from the  
791 Canadian Cancer Society (705615) and the Terry Fox Research Institute (1082). N.S.B. was  
792 supported by a DKFZ Postdoctoral Fellowship. F.J.S-R. was supported by the MSKCC TROT  
793 program (5T32CA160001), a GMTEC Postdoctoral Researcher Innovation Grant, and is an  
794 HHMI Hanna Gray Fellow.

795

## 796 **REFERENCES**

- 797 1. Blackledge, N. P. & Klose, R. J. The molecular principles of gene regulation by  
798 Polycomb repressive complexes. *Nat. Rev. Mol. Cell Biol.* 2021 2212 **22**, 815–833

- 799 (2021).
- 800 2. Déléris, A., Berger, F. & Duhaucourt, S. Role of Polycomb in the control of transposable  
801 elements. *Trends Genet.* **37**, 882–889 (2021).
- 802 3. O’Carroll, D. *et al.* The Polycomb -Group Gene Ezh2 Is Required for Early Mouse  
803 Development . *Mol. Cell. Biol.* **21**, 4330–4336 (2001).
- 804 4. Posfai, E. *et al.* Polycomb function during oogenesis is required for mouse embryonic  
805 development. *Genes Dev.* **26**, 920–932 (2012).
- 806 5. Chen, Z., Djekidel, M. N. & Zhang, Y. Distinct dynamics and functions of H2AK119ub1  
807 and H3K27me3 in mouse preimplantation embryos. *Nat. Genet.* **2021 534 53**, 551–563  
808 (2021).
- 809 6. Mei, H. *et al.* H2AK119ub1 guides maternal inheritance and zygotic deposition of  
810 H3K27me3 in mouse embryos. *Nat. Genet.* **2021 534 53**, 539–550 (2021).
- 811 7. Blackledge, N. P. *et al.* PRC1 Catalytic Activity Is Central to Polycomb System  
812 Function. *Mol. Cell* **77**, 857-874.e9 (2020).
- 813 8. Gao, Z. *et al.* PCGF Homologs, CBX Proteins, and RYBP Define Functionally Distinct  
814 PRC1 Family Complexes. *Mol. Cell* **45**, 344–356 (2012).
- 815 9. Hauri, S. *et al.* A High-Density Map for Navigating the Human Polycomb Complexome.  
816 *Cell Rep.* **17**, 583–595 (2016).
- 817 10. Fursova, N. A. *et al.* Synergy between Variant PRC1 Complexes Defines Polycomb-  
818 Mediated Gene Repression. *Mol. Cell* **74**, 1020-1036.e8 (2019).
- 819 11. Scelfo, A. *et al.* Functional Landscape of PCGF Proteins Reveals Both RING1A/B-  
820 Dependent-and RING1A/B-Independent-Specific Activities. *Mol. Cell* **74**, 1037-  
821 1052.e7 (2019).
- 822 12. Dobrinić, P., Szczurek, A. T. & Klose, R. J. PRC1 drives Polycomb-mediated gene  
823 repression by controlling transcription initiation and burst frequency. *Nat. Struct. Mol.*  
824 *Biol.* **2021 2810 28**, 811–824 (2021).
- 825 13. Tamburri, S. *et al.* Histone H2AK119 Mono-Ubiquitination Is Essential for Polycomb-  
826 Mediated Transcriptional Repression. *Mol. Cell* **77**, 840-856.e5 (2020).
- 827 14. Højfeldt, J. W. *et al.* Non-core Subunits of the PRC2 Complex Are Collectively

- 828 Required for Its Target-Site Specificity. *Mol. Cell* **76**, 423-436.e3 (2019).
- 829 15. Healy, E. *et al.* PRC2.1 and PRC2.2 Synergize to Coordinate H3K27 Trimethylation.  
830 *Mol. Cell* **76**, 437-452.e6 (2019).
- 831 16. Farcas, A. M. *et al.* KDM2B links the polycomb repressive complex 1 (PRC1) to  
832 recognition of CpG islands. *Elife* **2012**, (2012).
- 833 17. Wu, X., Johansen, J. V. & Helin, K. Fbx110/Kdm2b Recruits Polycomb Repressive  
834 Complex 1 to CpG Islands and Regulates H2A Ubiquitylation. *Mol. Cell* **49**, 1134–1146  
835 (2013).
- 836 18. He, J. *et al.* Kdm2b maintains murine embryonic stem cell status by recruiting PRC1  
837 complex to CpG islands of developmental genes. *Nat. Cell Biol.* **15**, 373–384 (2013).
- 838 19. Gearhart, M. D., Corcoran, C. M., Wamstad, J. A. & Bardwell, V. J. Polycomb Group  
839 and SCF Ubiquitin Ligases Are Found in a Novel BCOR Complex That Is Recruited to  
840 BCL6 Targets. *Mol. Cell. Biol.* **26**, 6880–6889 (2006).
- 841 20. Sánchez, C. *et al.* Proteomics analysis of Ring1B/Rnf2 interactions identifies a novel  
842 complex with the Fbx110/Jhdm1B histone demethylase and the Bcl6 interacting  
843 corepressor. *Mol. Cell. Proteomics* **6**, 820–834 (2007).
- 844 21. Junco, S. E. *et al.* Structure of the polycomb group protein PCGF1 in complex with  
845 BCOR reveals basis for binding selectivity of PCGF homologs. *Structure* **21**, 665–671  
846 (2013).
- 847 22. Wong, S. J. *et al.* KDM2B Recruitment of the Polycomb Group Complex, PRC1.1,  
848 Requires Cooperation between PCGF1 and BCORL1. *Structure* **24**, 1795–1801 (2016).
- 849 23. Banito, A. *et al.* The SS18-SSX Oncoprotein Hijacks KDM2B-PRC1.1 to Drive  
850 Synovial Sarcoma. *Cancer Cell* **33**, 527-541.e8 (2018).
- 851 24. Peters, T. L. *et al.* BCOR–CCNB3 fusions are frequent in undifferentiated sarcomas of  
852 male children. *Mod. Pathol.* 2015 284 **28**, 575–586 (2014).
- 853 25. Roy, A. *et al.* Recurrent internal tandem duplications of BCOR in clear cell sarcoma of  
854 the kidney. *Nat. Commun.* **6**, (2015).
- 855 26. Astolfi, A. *et al.* Whole transcriptome sequencing identifies BCOR internal tandem  
856 duplication as a common feature of clear cell sarcoma of the kidney. *Oncotarget* **6**,

- 857 40934–40939 (2015).
- 858 27. Pierron, G. *et al.* A new subtype of bone sarcoma defined by BCOR-CCNB3 gene  
859 fusion. *Nat. Genet.* **44**, 461–466 (2012).
- 860 28. Specht, K. *et al.* Novel BCOR-MAML3 and ZC3H7B-BCOR Gene Fusions in  
861 Undifferentiated Small Blue Round Cell Sarcomas. *Am. J. Surg. Pathol.* **40**, 433 (2016).
- 862 29. Sturm, D. *et al.* New Brain Tumor Entities Emerge from Molecular Classification of  
863 CNS-PNETs. *Cell* **164**, 1060–1072 (2016).
- 864 30. Perry, J. A., Seong, B. K. A. & Stegmaier, K. Biology and Therapy of Dominant Fusion  
865 Oncoproteins Involving Transcription Factor and Chromatin Regulators in Sarcomas.  
866 <https://doi.org/10.1146/annurev-cancerbio-030518-055710> **3**, 299–321 (2019).
- 867 31. Clark, J. *et al.* Identification of novel genes, SYT and SSX, involved in the  
868 t(X;18)(p11.2;q11.2) translocation found in human synovial sarcoma. *Nat. Genet.* **7**,  
869 502–508 (1994).
- 870 32. Ladanyi, M. Fusions of the SYT and SSX genes in synovial sarcoma. *Oncogene* vol. 20  
871 5755–5762 (2001).
- 872 33. Kadoch, C. & Crabtree, G. R. Reversible disruption of mSWI/SNF (BAF) complexes  
873 by the SS18-SSX oncogenic fusion in synovial sarcoma. *Cell* **153**, 71–85 (2013).
- 874 34. Mashtalir, N. *et al.* Modular Organization and Assembly of SWI/SNF Family Chromatin  
875 Remodeling Complexes. *Cell* **175**, 1272–1288.e20 (2018).
- 876 35. Li, J. *et al.* A Role for SMARCB1 in Synovial Sarcomagenesis Reveals That SS18-SSX  
877 Induces Canonical BAF Destruction. *Cancer Discov.* **11**, 2620–2637 (2021).
- 878 36. McBride, M. J. *et al.* The SS18-SSX Fusion Oncoprotein Hijacks BAF Complex  
879 Targeting and Function to Drive Synovial Sarcoma. *Cancer Cell* **33**, 1128–1141.e7  
880 (2018).
- 881 37. Shi, J. *et al.* Discovery of cancer drug targets by CRISPR-Cas9 screening of protein  
882 domains. *Nat. Biotechnol.* **33**, 661–667 (2015).
- 883 38. Shalem, O. *et al.* Genome-scale CRISPR-Cas9 knockout screening in human cells.  
884 *Science (80-. ).* **343**, 84–87 (2014).
- 885 39. He, W. *et al.* De novo identification of essential protein domains from CRISPR-Cas9

- 886 tiling-sgRNA knockout screens. *Nat. Commun.* **10**, (2019).
- 887 40. Lim, F. L., Soulez, M., Koczan, D., Thiesen, H. J. & Knight, J. C. A KRAB-related  
888 domain and a novel transcription repression domain in proteins encoded by SSX genes  
889 that are disrupted in human sarcomas. *Oncogene* **17**, 2013–2018 (1998).
- 890 41. Traynor, S. *et al.* Remodeling and destabilization of chromosome 1 pericentromeric  
891 heterochromatin by SSX proteins. *Nucleic Acids Res.* **47**, 6668–6684 (2019).
- 892 42. Dos Santos, N. R., De Bruijn, D. R. H., Kater-Baats, E., Otte, A. P. & Van Kessel, A.  
893 G. Delineation of the protein domains responsible for SYT, SSX, and SYT-SSX nuclear  
894 localization. *Exp. Cell Res.* **256**, 192–202 (2000).
- 895 43. Teves, S. S. & Henikoff, S. Salt fractionation of nucleosomes for genome-wide  
896 profiling. *Methods Mol. Biol.* **833**, 421–432 (2012).
- 897 44. Herrmann, C., Avgousti, D. & Weitzman, M. Differential Salt Fractionation of Nuclei  
898 to Analyze Chromatin-associated Proteins from Cultured Mammalian Cells. *BIO-*  
899 *PROTOCOL* **7**, (2017).
- 900 45. Ohlenbusch, H. H., Olivera, B. M., Tuan, D. & Davidson, N. Selective dissociation of  
901 histones from calf thymus nucleoprotein. *J. Mol. Biol.* **25**, 299–315 (1967).
- 902 46. Yoshida, A. *et al.* Identification of novel SSX1 fusions in synovial sarcoma. *Mod.*  
903 *Pathol.* **2021** 1–12 (2021) doi:10.1038/s41379-021-00910-x.
- 904 47. Soulez, M., Saurin, A. J., Freemont, P. S. & Knight, J. C. SSX and the synovial-sarcoma-  
905 specific chimaeric protein SYT-SSX co-localize with the human Polycomb group  
906 complex. *Oncogene* **18**, 2739–2746 (1999).
- 907 48. McBride, M. J. *et al.* The nucleosome acidic patch and H2A ubiquitination underlie  
908 mSWI/SNF recruitment in synovial sarcoma. *Nat. Struct. Mol. Biol.* **27**, 836–845 (2020).
- 909 49. Dale, N. C., Johnstone, E. K. M., White, C. W. & Pflieger, K. D. G. NanoBRET: The  
910 bright future of proximity-based assays. *Frontiers in Bioengineering and Biotechnology*  
911 vol. 7 56 (2019).
- 912 50. Machleidt, T. *et al.* NanoBRET-A Novel BRET Platform for the Analysis of Protein-  
913 Protein Interactions. *ACS Chem. Biol.* **10**, 1797–1804 (2015).
- 914 51. Mattioli, F. *et al.* RNF168 ubiquitinates K13-15 on H2A/H2AX to drive DNA damage

- 915 signaling. *Cell* **150**, 1182–1195 (2012).
- 916 52. Costanzi, C. & Pehrson, J. R. Histone macroH2A1 is concentrated in the inactive X  
917 chromosome of female mammals. *Nature* **393**, 599–601 (1998).
- 918 53. Chadwick, B. P. & Willard, H. F. Histone H2A variants and the inactive X chromosome:  
919 Identification of a second macroH2A variant. *Hum. Mol. Genet.* **10**, 1101–1113 (2001).
- 920 54. Hernández-Muñoz, I. *et al.* Stable X chromosome inactivation involves the PRC1  
921 Polycomb complex and requires histone MACROH2A1 and the CULLIN3/SPOP  
922 ubiquitin E3 ligase. *Proc. Natl. Acad. Sci. U. S. A.* **102**, 7635–7640 (2005).
- 923 55. Buschbeck, M. *et al.* The histone variant macroH2A is an epigenetic regulator of key  
924 developmental genes. *Nat. Struct. Mol. Biol.* **16**, 1074–1079 (2009).
- 925 56. Gaspar-Maia, A. *et al.* MacroH2A histone variants act as a barrier upon reprogramming  
926 towards pluripotency. *Nat. Commun.* **4**, 1–13 (2013).
- 927 57. Buschbeck, M. & Croce, L. Di. Approaching the molecular and physiological function  
928 of macroH2A variants. *Epigenetics* **5**, 118–123 (2010).
- 929 58. Skene, P. J. & Henikoff, S. An efficient targeted nuclease strategy for high-resolution  
930 mapping of DNA binding sites. *Elife* **6**, (2017).
- 931 59. Gamble, M. J., Frizzell, K. M., Yang, C., Krishnakumar, R. & Kraus, W. L. The histone  
932 variant macroH2A1 marks repressed autosomal chromatin, but protects a subset of its  
933 target genes from silencing. *Genes Dev.* **24**, 21–32 (2010).
- 934 60. Cooper, S. *et al.* Targeting Polycomb to Pericentric Heterochromatin in Embryonic Stem  
935 Cells Reveals a Role for H2AK119u1 in PRC2 Recruitment. *Cell Rep.* **7**, 1456–1470  
936 (2014).
- 937 61. Cooper, S. *et al.* Jarid2 binds mono-ubiquitylated H2A lysine 119 to mediate crosstalk  
938 between Polycomb complexes PRC1 and PRC2. *Nat. Commun.* **7**, 1–8 (2016).
- 939 62. Long, H. K., Blackledge, N. P. & Klose, R. J. ZF-CxxC domain-containing proteins,  
940 CpG islands and the chromatin connection. in *Biochemical Society Transactions* vol. 41  
941 727–740 (Portland Press, 2013).
- 942 63. Zhou, Y. *et al.* High-throughput screening of a CRISPR/Cas9 library for functional  
943 genomics in human cells. *Nature* **509**, 487–491 (2014).

- 944 64. Hu, J. *et al.* Direct activation of human and mouse Oct4 genes using engineered TALE  
945 and Cas9 transcription factors. *Nucleic Acids Res.* **42**, 4375–90 (2014).
- 946 65. Dixon-McDougall, T. & Brown, C. J. Independent domains for recruitment of PRC1  
947 and PRC2 by human XIST. *PLoS Genet.* **17**, e1009123 (2021).
- 948 66. Schaefer, E. J. *et al.* BCOR and BCORL1 mutations drive epigenetic reprogramming  
949 and oncogenic signaling by unlinking PRC1.1 from target genes. *Blood Cancer Discov.*  
950 bloodcandisc.0115.2021 (2021) doi:10.1158/2643-3230.BCD-21-0115.
- 951 67. Wang, Z. *et al.* A Non-canonical BCOR-PRC1.1 Complex Represses Differentiation  
952 Programs in Human ESCs. *Cell Stem Cell* **22**, 235-251.e9 (2018).
- 953 68. Kao, Y. C. *et al.* BCOR Overexpression is a Highly Sensitive Marker in Round Cell  
954 Sarcomas with BCOR Genetic Abnormalities. *Am. J. Surg. Pathol.* **40**, 1670 (2016).
- 955 69. Kao, Y. C. *et al.* BCOR upregulation in a poorly differentiated synovial sarcoma with  
956 SS18L1-SSX1 fusion-A pathologic and molecular pitfall. *Genes. Chromosomes Cancer*  
957 **56**, 296–302 (2017).
- 958 70. Rose, N. R. *et al.* RYBP stimulates PRC1 to shape chromatin-based communication  
959 between polycomb repressive complexes. *Elife* **5**, (2016).
- 960 71. Guo, J. *et al.* Single-cell analysis of the developing human testis reveals somatic niche  
961 cell specification and fetal germline stem cell establishment. *Cell Stem Cell* **28**, 764-  
962 778.e4 (2021).
- 963 72. Scott, R. W., Arostegui, M., Schweitzer, R., Rossi, F. M. V. & Underhill, T. M. Hic1  
964 Defines Quiescent Mesenchymal Progenitor Subpopulations with Distinct Functions  
965 and Fates in Skeletal Muscle Regeneration. *Cell Stem Cell* **25**, 797-813.e9 (2019).
- 966 73. Haldar, M., Hancock, J. D., Coffin, C. M., Lessnick, S. L. & Capecchi, M. R. A  
967 Conditional Mouse Model of Synovial Sarcoma: Insights into a Myogenic Origin.  
968 *Cancer Cell* **11**, 375–388 (2007).
- 969 74. Paigen, K. & Petkov, P. M. PRDM9 and Its Role in Genetic Recombination. *Trends in*  
970 *Genetics* vol. 34 291–300 (2018).
- 971 75. Grey, C., Baudat, F. & de Massy, B. PRDM9, a driver of the genetic map. *PLoS Genet.*  
972 **14**, (2018).



- 973 76. Diagouraga, B., Clé, J. A. J., Duret, L., Kadlec, J. & De Massy, B. PRDM9  
974 Methyltransferase Activity Is Essential for Meiotic DNA Double-Strand Break  
975 Formation at Its Binding Sites Data resources GSE108953 Diagouraga et al. *Mol. Cell*  
976 **69**, 853-865.e6 (2018).
- 977 77. Thibault-Sennett, S. *et al.* Interrogating the Functions of PRDM9 Domains in Meiosis.  
978 *Genetics* **209**, 475–487 (2018).
- 979 78. Boulay, G. *et al.* The chromatin landscape of primary synovial sarcoma organoids is  
980 linked to specific epigenetic mechanisms and dependencies. (2020)  
981 doi:10.26508/lsa.202000808.
- 982 79. Zhao, J. *et al.* RYBP/YAF2-PRC1 complexes and histone H1-dependent chromatin  
983 compaction mediate propagation of H2AK119ub1 during cell division. *Nat. Cell Biol.*  
984 *2020* **22**, 439–452 (2020).
- 985 80. Türeci, Ö. *et al.* EXPRESSION OF SSX GENES IN HUMAN TUMORS. *J. Cancer* **77**,  
986 19–23 (1998).
- 987 81. Gure, A. O. *et al.* SSX: A multigene family with several members transcribed in normal  
988 testis and human cancer. *Wiley Online Libr.* **72**, 965–971 (1997).
- 989 82. Smith, H. A. & McNeel, D. G. The SSX family of cancer-testis antigens as target  
990 proteins for tumor therapy. *Clin. Dev. Immunol.* **2010**, (2010).
- 991 83. Sonobe, H. *et al.* Establishment and characterization of a new human clear-cell sarcoma  
992 cell-line, HS-MM. *J. Pathol.* **169**, 317–322 (1993).
- 993 84. Kawai, A. *et al.* Establishment and characterization of a biphasic synovial sarcoma cell  
994 line, SYO-1. *Cancer Lett.* **204**, 105–113 (2004).
- 995 85. Sanjana, N. E., Shalem, O. & Zhang, F. Improved vectors and genome-wide libraries  
996 for CRISPR screening. *Nature Methods* vol. 11 783–784 (2014).
- 997 86. Schlager, S. *et al.* Inducible knock-out of BCL6 in lymphoma cells results in tumor  
998 stasis. *Oncotarget* **11**, 875–890 (2020).
- 999 87. Hayer, A. *et al.* Engulfed cadherin fingers are polarized junctional structures between  
1000 collectively migrating endothelial cells. *Nat. Cell Biol.* **18**, 1311–1323 (2016).
- 1001 88. Sakai, Y. *et al.* Protein interactome reveals converging molecular pathways among

- 1002 autism disorders. *Sci. Transl. Med.* **3**, (2011).
- 1003 89. Schneider, W. M. *et al.* Genome-Scale Identification of SARS-CoV-2 and Pan-  
1004 coronavirus Host Factor Networks. *Cell* **184**, 120-132.e14 (2021).
- 1005 90. Soto-Feliciano, Y. M. *et al.* A molecular switch between mammalian MLL complexes  
1006 dictates response to Menin-MLL inhibition. *bioRxiv* 2021.10.22.465184 (2022)  
1007 doi:10.1101/2021.10.22.465184.
- 1008 91. Morgens, D. W. *et al.* Genome-scale measurement of off-target activity using Cas9  
1009 toxicity in high-throughput screens. *Nat. Commun.* 2017 81 **8**, 1–8 (2017).
- 1010 92. Ritchie, M. E. *et al.* limma powers differential expression analyses for RNA-sequencing  
1011 and microarray studies. *Nucleic Acids Res.* **43**, e47 (2015).
- 1012 93. Huber, W., Von Heydebreck, A., Sültmann, H., Poustka, A. & Vingron, M. Variance  
1013 stabilization applied to microarray data calibration and to the quantification of  
1014 differential expression. *Bioinformatics* **18 Suppl 1**, (2002).
- 1015 94. Langmead, B., Trapnell, C., Pop, M. & Salzberg, S. L. Ultrafast and memory-efficient  
1016 alignment of short DNA sequences to the human genome. *Genome Biol.* **10**, 25 (2009).
- 1017 95. Langmead, B. & Salzberg, S. L. Fast gapped-read alignment with Bowtie 2. *Nat.*  
1018 *Methods* **9**, 357–359 (2012).
- 1019 96. Zhang, Y. *et al.* Model-based analysis of ChIP-Seq (MACS). *Genome Biol.* **9**, 1–9  
1020 (2008).
- 1021 97. Feng, J., Liu, T., Qin, B., Zhang, Y. & Liu, X. S. Identifying ChIP-seq enrichment using  
1022 MACS. *Nat. Protoc.* **7**, 1728–1740 (2012).
- 1023 98. Orlando, D. A. *et al.* Quantitative ChIP-Seq normalization reveals global modulation of  
1024 the epigenome. *Cell Rep.* **9**, 1163–1170 (2014).
- 1025 99. Ramírez, F. *et al.* deepTools2: a next generation web server for deep-sequencing data  
1026 analysis. *Nucleic Acids Res.* **44**, W160–W165 (2016).
- 1027 100. Guo, J. *et al.* The adult human testis transcriptional cell atlas. *Cell Res.* **28**, 1141–1157  
1028 (2018).
- 1029

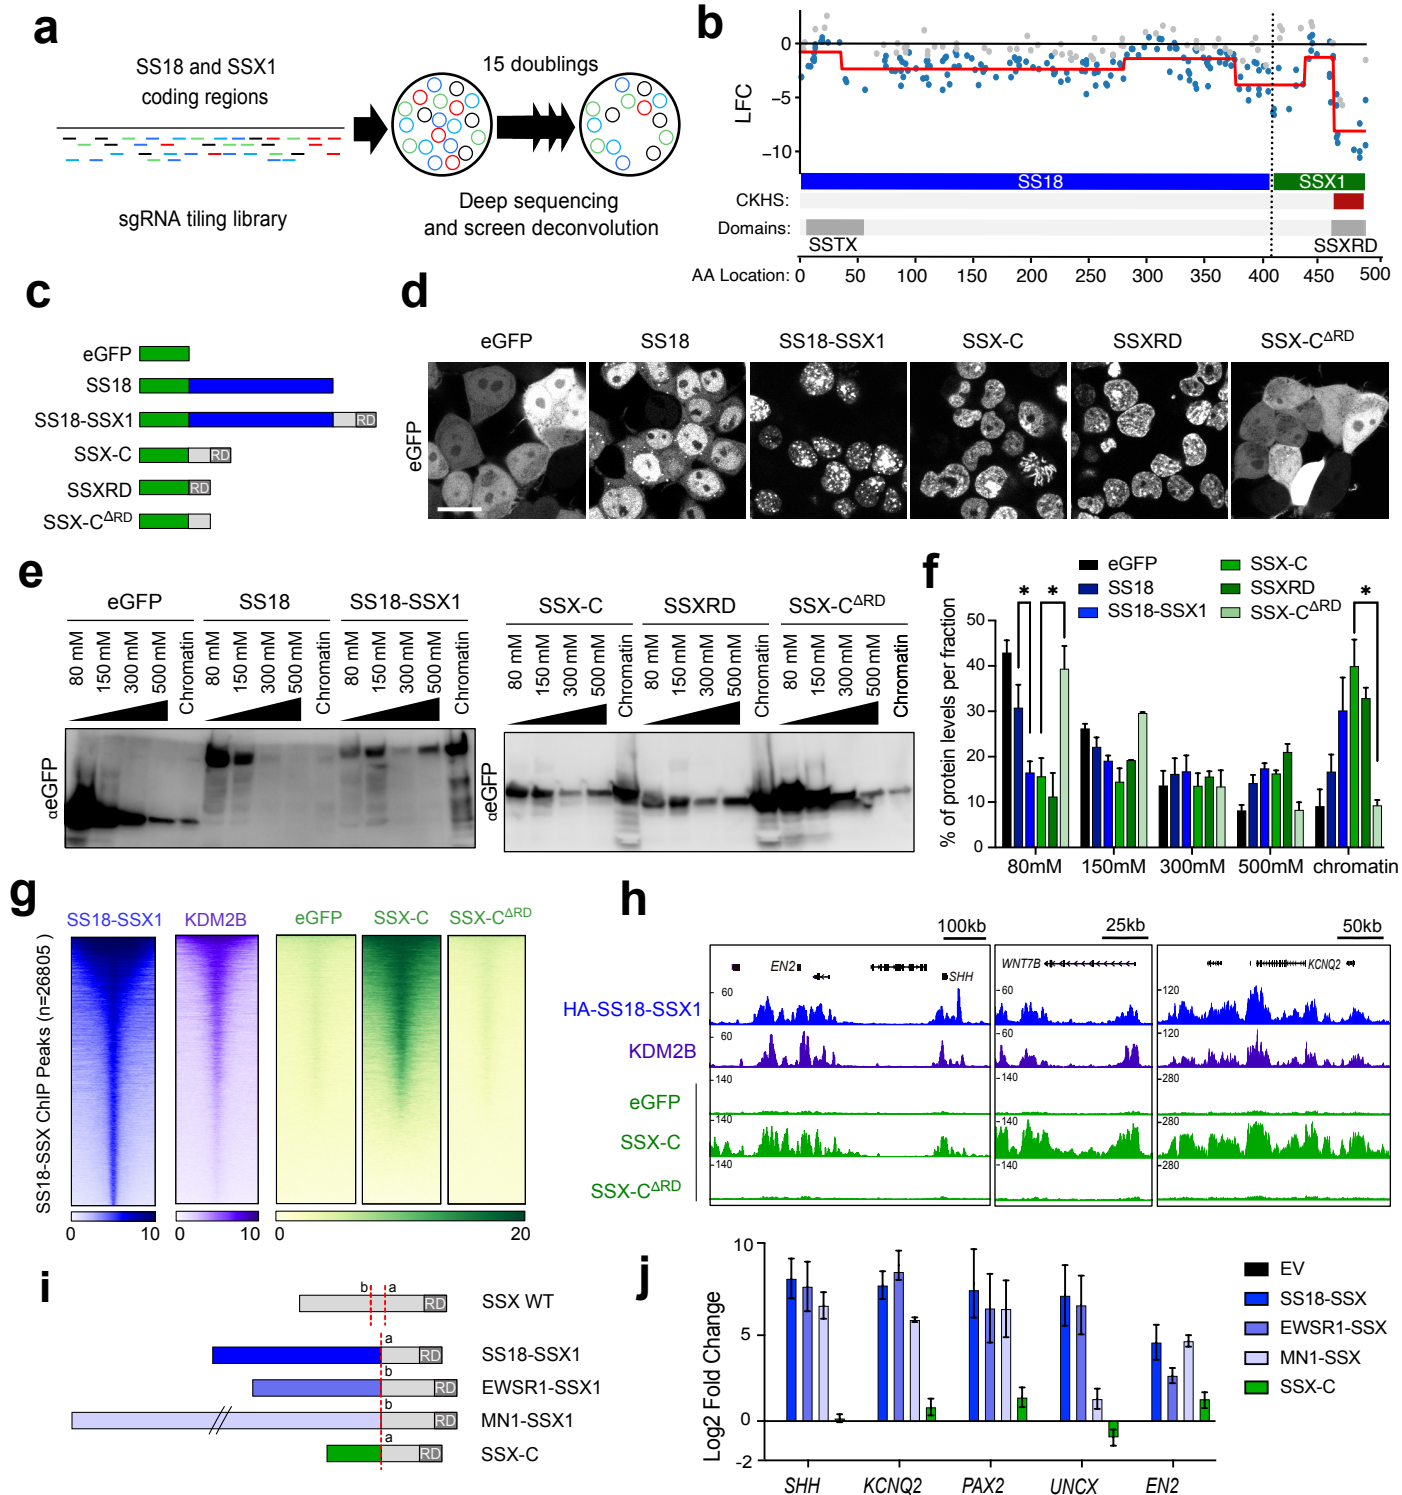

**Figure 1: SSX C-terminus directs tight and specific SS18-SSX chromatin binding.**

**a)** Layout of CRISPR-Cas9 knockout gene-tilling screen. **b)** Mapping of CRISPR knockout hyper-sensitive (CKHS) regions in SS18-SSX1 using ProTiler based on log<sub>2</sub> fold changes (LFC) of sgRNAs representation in HS-SY-II synovial sarcoma cells. The CKHS region is highlighted in dark red and corresponds to the SSXR<sub>D</sub> PFAM sequence (PF09514). **c)** Schematic representation of eGFP (green) fused constructs for SS18, SS18-SSX1, SSX-C (78aa of SSX1 present in the SS18-SSX1 fusion), SSXR<sub>D</sub> (last 34aa of SSX-C) or SSX-C<sup>ΔRD</sup> (SSX-C with a deletion of the SSXR<sub>D</sub>). **d)** Live confocal imaging of the eGFP-fused constructs in HEK193T cells. Scale bar corresponds to 20μm. **e)** Salt extraction assay in HEK293T expressing the various eGFP constructs. The proteins are detected using an eGFP antibody. **f)** Percentage of total protein levels per fraction in two or three biological replicates. Data represents the mean and the standard error of the mean (S.E.M). Asterisks represent p-values of paired one-tailed t-test between groups, \* p < 0.05. **g)** Heatmaps for HA-SS18-SSX1, KDM2B ChIP-seq from Banito et al., 2018 and eGFP ChIP in HS-SY-II cells expressing eGFP fused SSX-C or SSX-C<sup>ΔRD</sup>. Heatmaps represent ChIP-seq signals over HA-SS18-SSX1 broad peaks (n=26805). Rows correspond to ±5-kb regions across the midpoint of each HA-enriched region, ranked by increasing signal in HS-SY-II cells. **h)** Gene tracks for HA-SS18-SSX1, KDM2B and eGFP ChIP-seq at the *EN2*, *WNT7B* and *KCNQ2* loci. **i)** Schematic representing new synovial sarcoma fusions. SS18-SSX1 and the SSX-C contain the canonical breakpoint “a”, while EWSR1-SSX1 and MN1-SSX1 exhibit an alternative breakpoint “b”. **j)** qRT-PCR displaying Log<sub>2</sub> fold change of mRNA levels relative to *GAPDH* in mesenchymal stem cells (MSCs) expressing the new fusion constructs and controls. Values are normalized to empty vector expression in three biological replicates. Data represents the mean and the standard error of the mean (S.E.M).

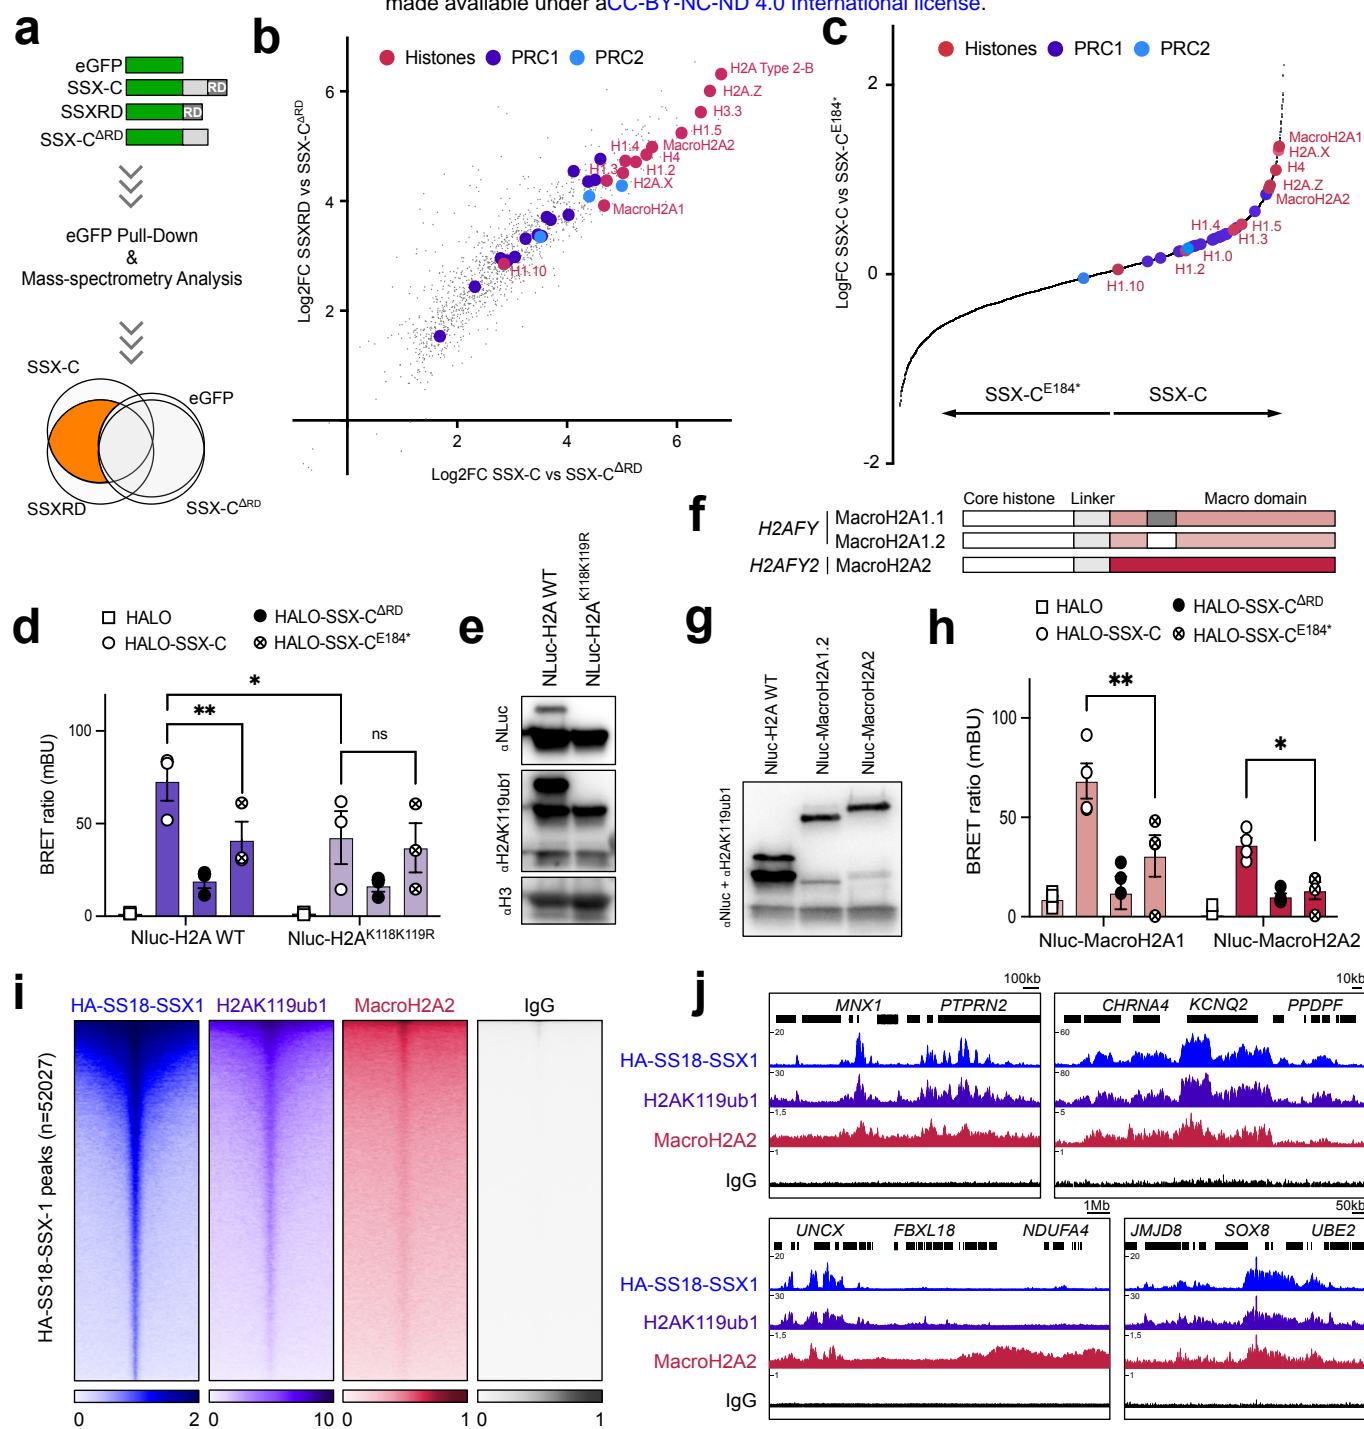

**Figure 2: The SSXR acidic tail links SSX to histone H2AK119ub1 and MacroH2A domains.**

**a)** Schematic representing the layout of the eGFP pull down and mass-spectrometry analysis. Common SSX-C and SSXR enriched hits (highlighted in orange) were identified. **b)** Log<sub>2</sub> fold change correlation plot of eGFP-SSXR and eGFP-SSX-C mass spectrometry data following eGFP pull down in HS-SY-II cells. Data was normalized to eGFP-SSX-C<sup>ARD</sup>. **c)** Log fold change plot between eGFP-SSX-C and eGFP-SSX-C<sup>E184\*</sup> mass spectrometry data following eGFP pull down in two biological replicates. Data was normalized to eGFP. **d)** BRET ratio (mBU) in Nluc-H2A or Nluc-H2A<sup>K118K119R</sup> transfected HEK293T cells expressing empty vector HALO, HALO-SSX-C, HALO-SSX-C<sup>ARD</sup> or HALO-SSX-C<sup>E184\*</sup>. Values represent 3 biological replicates. Asterisks represent p-values of paired one-tailed t-test between groups \*\* p < 0.01, \* p < 0.05. **e)** Western blot of histone acid extracts from HEK293T cells transfected with either Nluc-H2A or Nluc-H2A<sup>K118K119R</sup> revealed with Nluc, H2AK119ub1 and H3 antibodies. **f)** Illustration of the two MacroH2A genes, *H2AFY* encoding the two isoforms MacroH2A1.1 and MacroH2A1.2 which differ by one exon (grey/white box) within the Macro domain (pink) and *H2AFY2* encoding MacroH2A2. **g)** Western blot of histone acid extracts from HEK293T cells transfected with either Nluc-H2A, Nluc-MacroH2A1.2 or Nluc-MacroH2A2. Detection was performed using Nluc mixed with H2AK119ub1 and H3 antibodies. **h)** BRET ratio (mBU) in Nluc-H2A, Nluc-macroH2A1.2 or Nluc-macroH2A2 transfected HEK293T cells expressing empty vector HALO, HALO-SSX-C, HALO-SSX-C<sup>ARD</sup> or HALO-SSX-C<sup>E184\*</sup>. Values represent 4 biological replicates. Asterisks represent p-values of paired one-tailed t-test between groups (\* p < 0.05, \*\* p < 0.01). **i)** Heatmaps of HA-SS18-SSX1, H2AK119ub1 and MacroH2A2 CUT&RUN signals over HA-SS18-SSX1 peaks in HS-SY-II cells (n=52027). Rows correspond to ±5-kb regions across the midpoint of each signal, ranked by increasing signal. **j)** Gene tracks for HA-SS18-SSX1, H2AK119ub1 and MacroH2A2 CUT&RUN in HS-SY-II cells at the *MNX1*, *KCNQ2*, *UNCX* and *SOX8*.

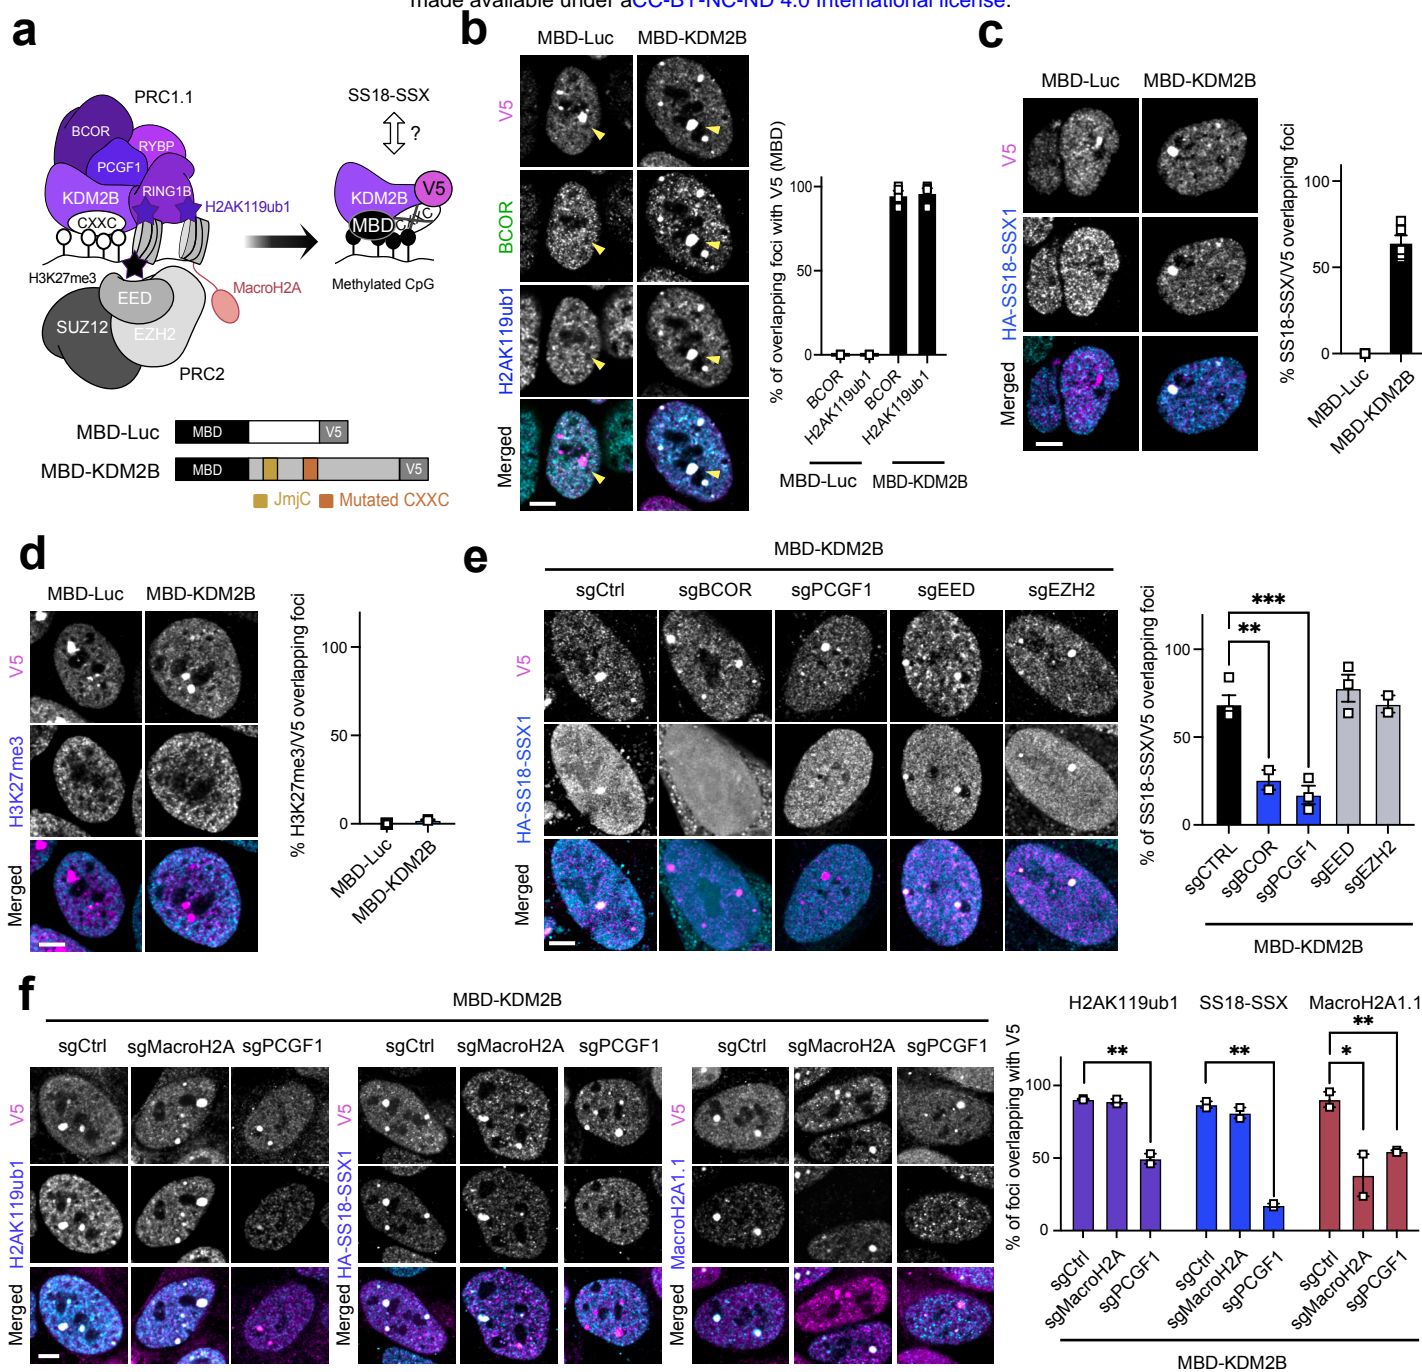

**Figure 3: PRC1.1 deposits H2AK119ub1 and MacroH2A and regulates SS18-SSX recruitment independently of PRC2.**

**a** Up, Representation of the methyl binding domain (MBD)-mediated targeting approach of proteins to methylated CpG. Here, the CXXC mutated KDM2B is redirected to methylated CpG via the MBD. Bottom, Schematic representing the MBD (black square) fusion constructs for Luciferase control (Luc) and KDM2B. The KDM2B long isoform contains the histone demethylase JmjC domain (gold box) and a mutated CXXC domain (dark orange). Both constructs contain a V5 tag. **b** Left, Immunofluorescence of human synovial sarcoma (HS-SY-II) cells displaying the MBD constructs (V5, magenta), BCOR (green) and H2AK119ub1 (cyan). Yellow arrow heads point to the MBD foci. Scale bars represents 5 $\mu$ m throughout the figure. Right, quantification of the percentage of BCOR or H2AK119ub1 foci overlapping a V5 foci in 3 or 4 biological replicates. Data represents the mean and the standard error of the mean (S.E.M). **c** Left, Immunofluorescence for V5 (magenta) and SS18-SSX1 (HA, cyan). Right, quantification of the percentage of HA (SS18-SSX1) foci overlapping a V5 foci in 2 to 5 biological replicates. **d** Left, Immunofluorescence for V5 (magenta) and H3K27me3 (cyan). Right, quantification of the percentage of BCOR or H3K27me3 foci overlapping with V5 foci in 2 biological replicates. Data represents the mean and S.E.M. **e** Left, Immunofluorescence of MBD-KDM2B (V5, magenta) in the presence of different sgRNAs (eGFP background fluorescence) with SS18-SSX1 (HA, cyan) in in HS-SY-II-Cas9 cells. Right, quantification of the percentage of HA (SS18-SSX1) foci overlapping a V5 foci in 2 to 4 biological replicates. Data represents the mean and S.E.M. Asterisks represent p-values of unpaired one-tailed t-test between groups (\*\* p < 0.01 and \*\*\* p < 0.001). **f** Left, Immunofluorescence images of MBD-KDM2B (V5, magenta) with SS18-SSX or H2AK119ub1 or MacroH2A1.1 (cyan) in HS-SY-II-Cas9 cells expressing sgCtrl, sgMacroH2A (targeting both histone genes *H2AFY* and *H2AFY2*) or sgPCGF1. Right, quantification of the percentage of foci overlapping MBD-KDM2B foci in 2 biological replicates. Data represents the mean and S.E.M. Asterisks represent p-values of unpaired one-tailed t-test between groups (\* p < 0.05 and \*\* p < 0.01).

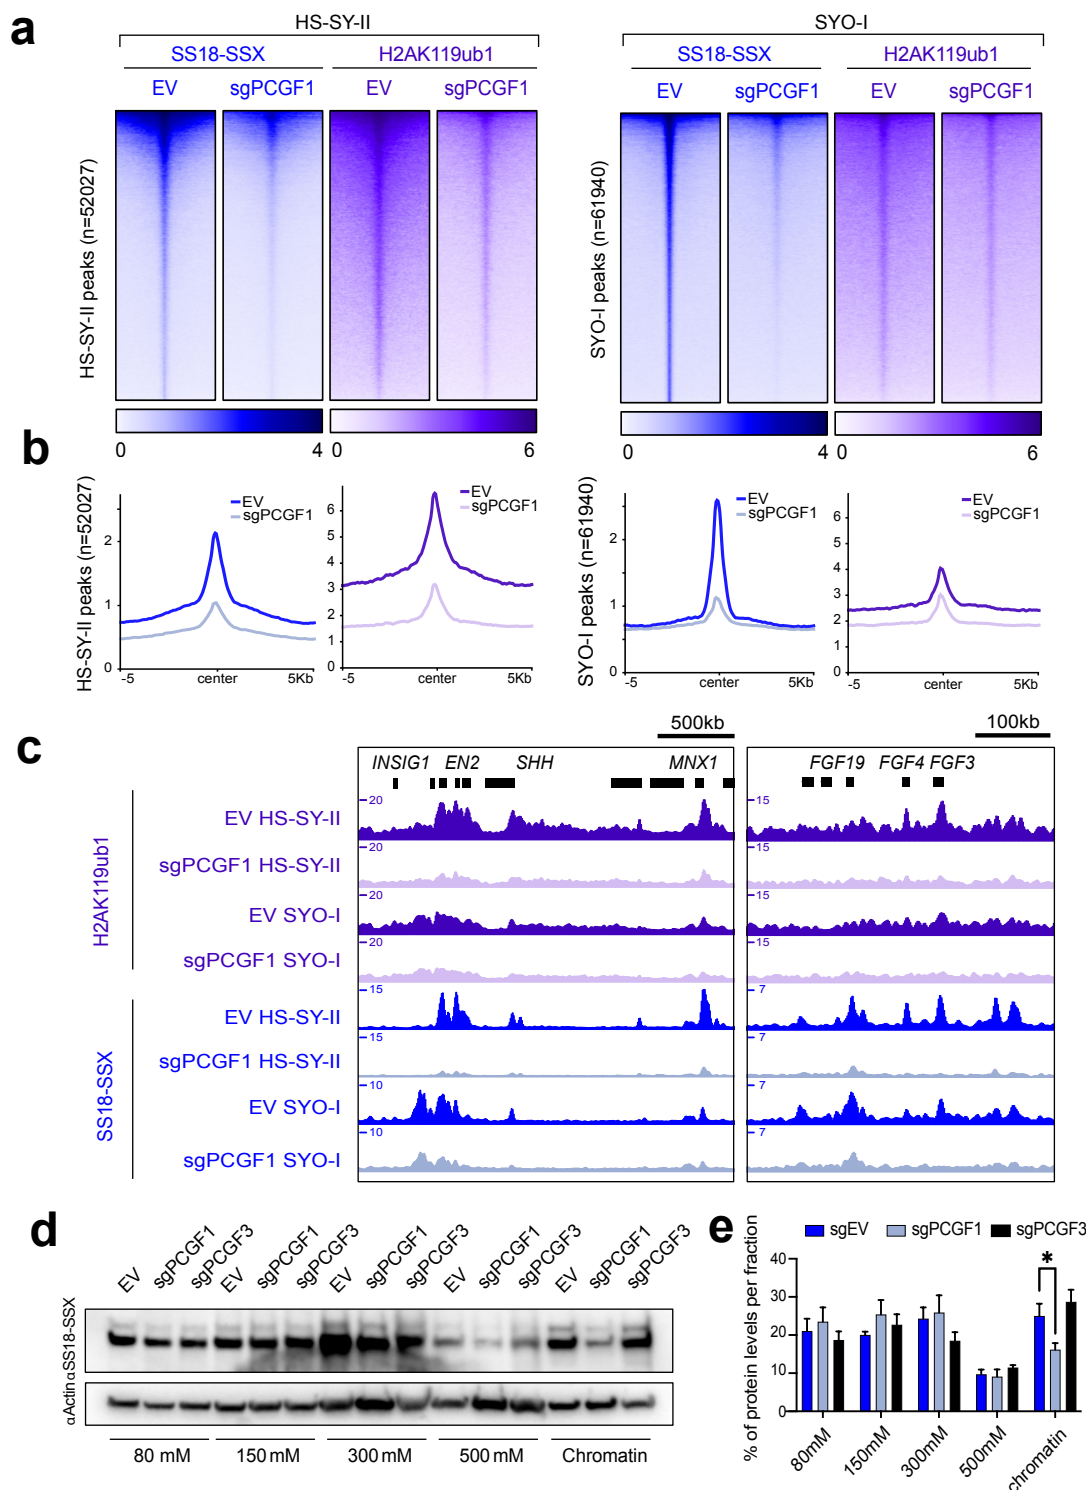

**Figure 4: PRC1.1 controls global H2AK119ub1 deposition and regulates SS18-SSX recruitment.**

**a**) Heatmaps of H2AK119ub1 (purple) or SS18-SSX (blue) CUT&RUN signals in HS-SY-II (left) and SYO-I (right) Cas9 cells expressing empty sgRNA as control (EV) or targeting PCGF1 (sgPCGF1). Both heatmaps represent CUT&RUN signals over HA-SS18-SSX1 peaks in HS-SY-II (left, n=52027) or SS18-SSX2 peaks in SYO-I (right, n=61940). Rows correspond to  $\pm 5$ -kb regions across the midpoint of each enriched region, ranked by increasing signal. **b**) H2AK119ub1 and SS18-SSX CUT&RUN score distributions across HA-SS18-SSX1 peaks in HS-SY-II (left, n=52027) or the SS18-SSX2 peaks in SYO-I (right, n=61940). **c**) Gene track for H2AK119ub1 and SS18-SSX CUT&RUN at the *EN2-SHH-NOM1* and *FGF4-FGF3* loci. **d**) Salt extraction assay displaying SS18-SSX1 levels by western blot in HS-SY-II-Cas9 cells expressing an empty vector (EV) or sgRNAs against PCGF1 or PCGF3. **e**) Quantification of the SS18-SSX protein distribution in the various salt extraction fractions. Data represents the mean and S.E.M for the percentage of total protein per fraction in 3 biological replicates. Asterisks represent p-values of paired one-tailed t-test between groups (\* p < 0.05).

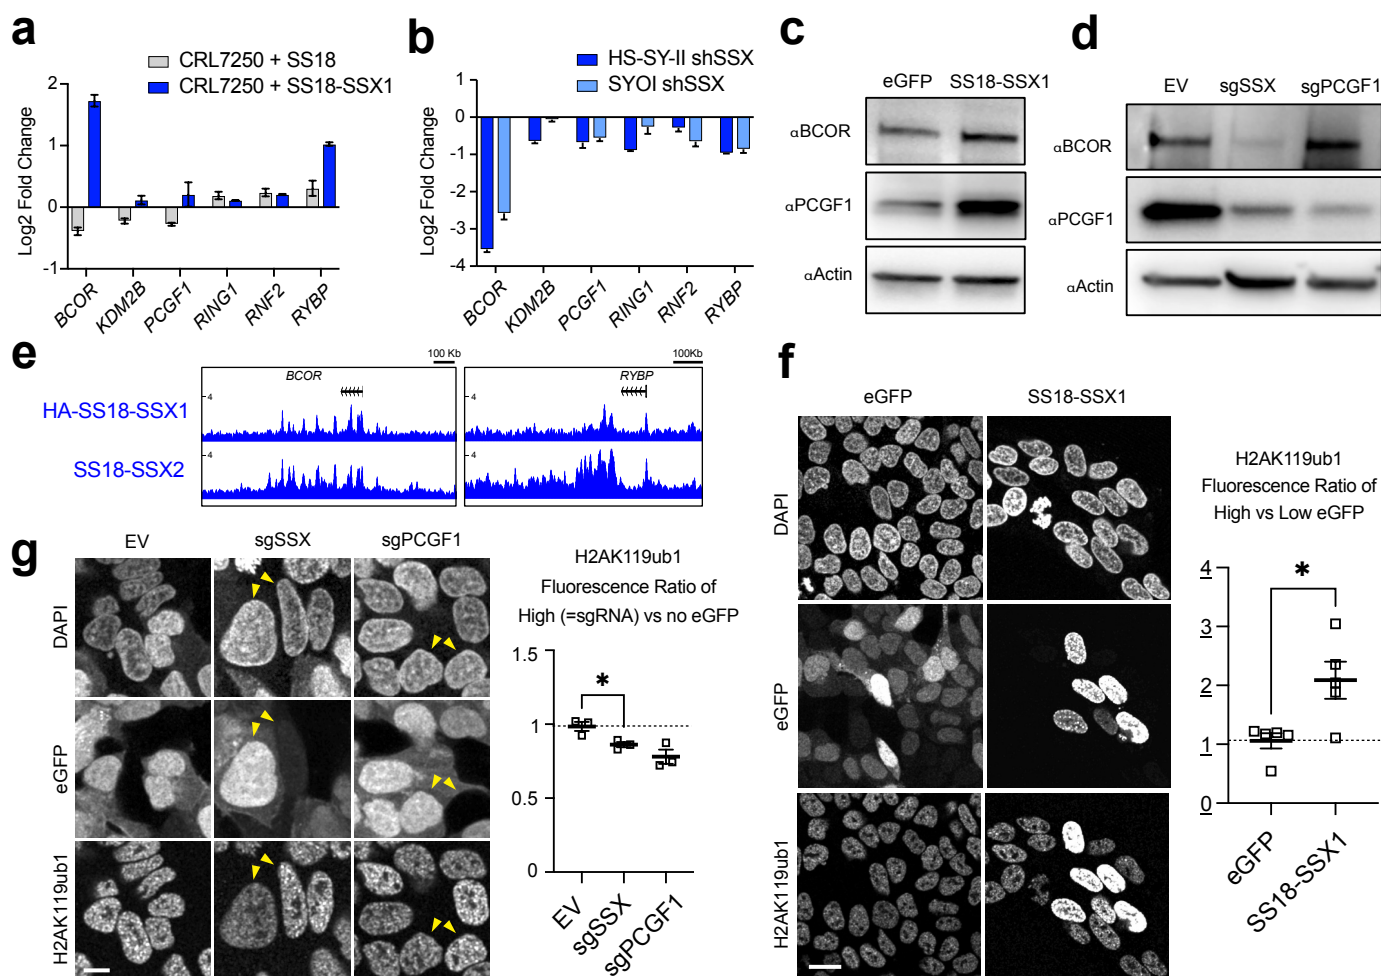

**Figure 5: SS18-SSX regulates expression of PRC1.1 components and increases H2AK119ub levels**

**a**) Log<sub>2</sub> Fold change of RPKM values from RNA sequencing in CRL7250 cells expressing SS18 or SS18-SSX1 compared to naïve cells in two biological replicates. Data from (McBride et al., 2018). **b**) Log<sub>2</sub> Fold change of RPKM values from RNA sequencing in HS-SY-II and SYO-I cells after knockdown of SS18-SSX compared to shCtrl cells in two biological replicates. Data from (McBride et al., 2018). **c**, **d**) Western blot of whole cell extracts from mesenchymal stem cells expressing eGFP or eGFP-SS18-SSX1 (**c**); and from HS-SY-II-Cas9 cells expressing empty sgRNA vector (EV) or sgRNA against SSX or PCGF1 (sgSSX, sgPCGF1) (**d**). Proteins were detected using BCOR and PCGF1 antibodies and Beta-actin was used as loading control. **e**) Gene tracks for HA-SS18-SSX1 and SS18-SSX2 CUT&RUN at the *BCOR* and *RYBP* loci. **f**) Left, Immunofluorescence of eGFP-fused constructs (eGFP, eGFP-SS18-SSX1) expressed in HS-SY-II with eGFP signals (green) and nucleus stained with DAPI and H2AK119ub1. Right, quantification of H2AK119ub1 fluorescence ratio in high versus low eGFP cells in 5 biological replicates. Data represents the mean and the S.E.M. Asterisks represent p-values of paired one-tailed t-test between groups (\* p < 0.05). **g**) Left, H2AK119ub1 immunofluorescence in HS-SY-II-Cas9 cells expressing empty sgRNA vector (EV) or sgRNA against SSX or PCGF1 (sgSSX, sgPCGF1). sgRNA expressing cells are positive for eGFP. Cells were mixed with non sgRNA expressing cells for direct comparison of H2AK119ub1 signal intensity (yellow arrow heads). Right, quantification of the H2AK119ub1 fluorescence ratio in eGFP (=sgRNA) versus no eGFP cells in 3 biological replicates. Data represents the mean and the standard error of the mean (S.E.M). Asterisks represent p-values of paired one-tailed t-test between groups (\* p < 0.05). Scale bars represents 10µm. Scale bars represents 20µm.

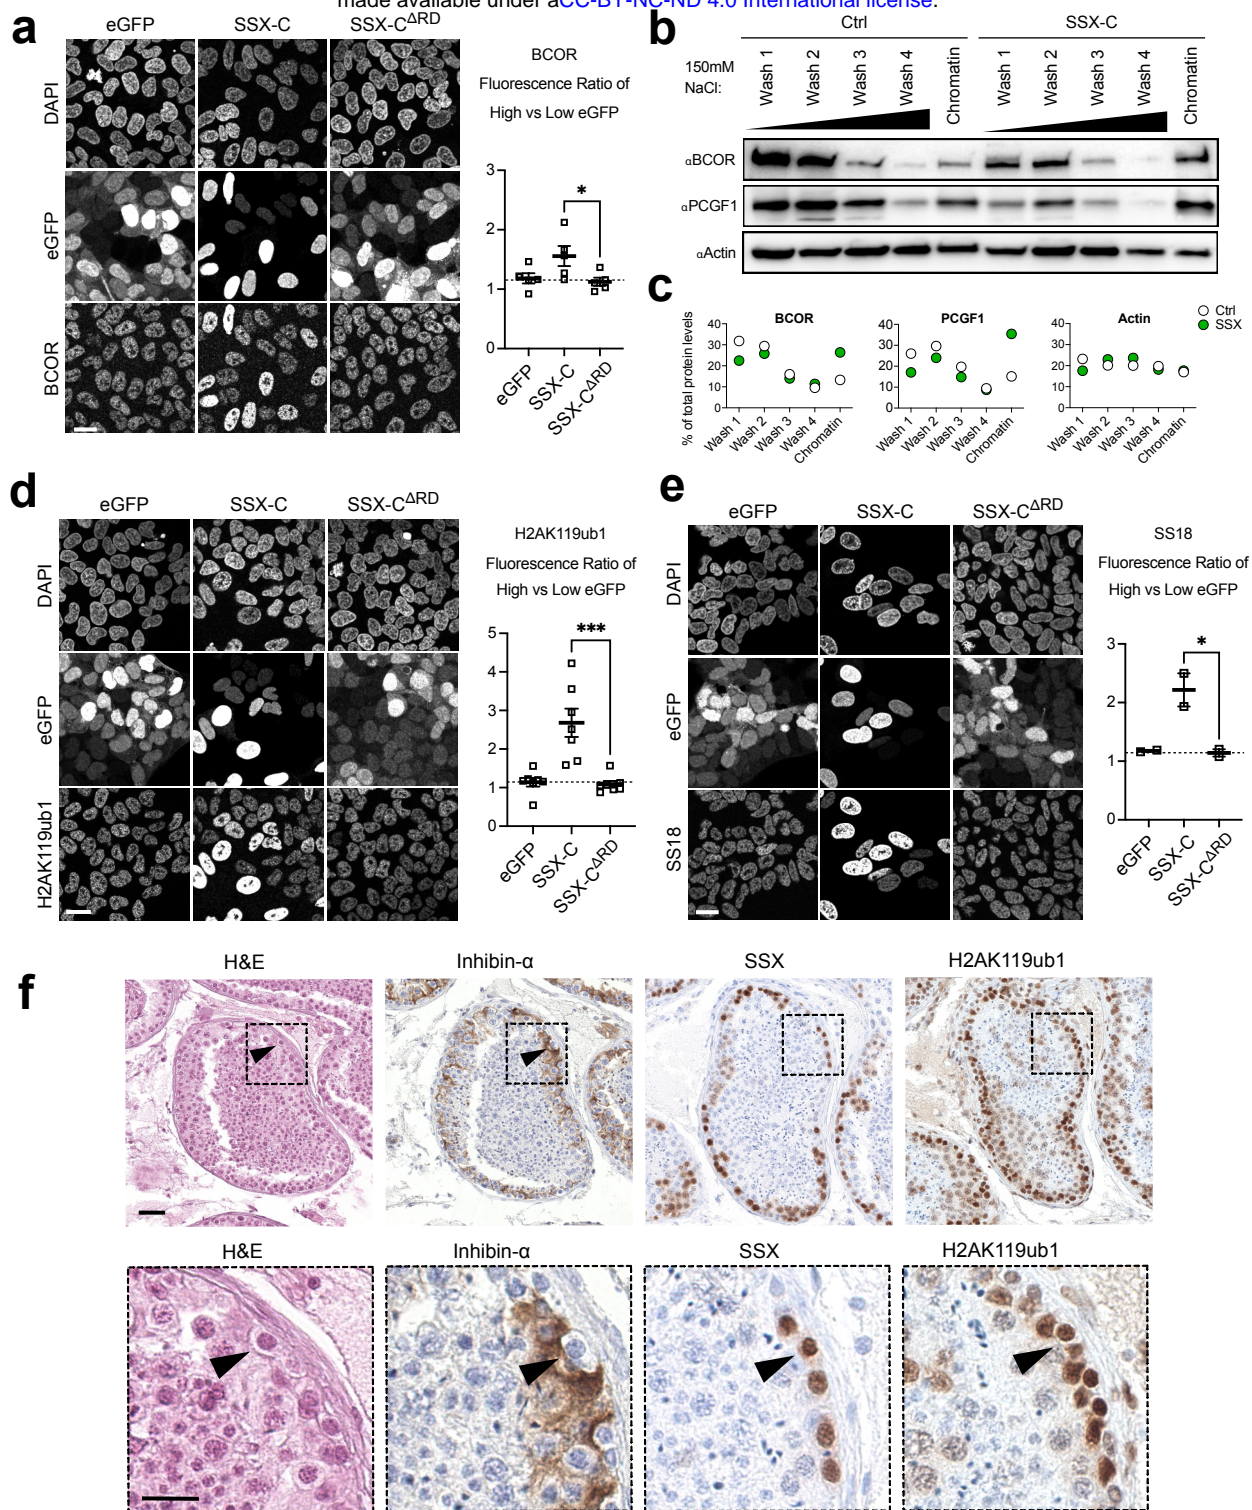

**Figure 6: SSX-C increases PRC1.1 stability thus reinforcing H2AK119ub1 levels and SS18-SSX occupancy**

**a)** Left, Immunofluorescence against BCOR in HS-SY-II synovial sarcoma cells expressing eGFP-fused constructs (eGFP, eGFP-SSX-C and eGFP-SSX-C<sup>ARD</sup>). Right, quantification of BCOR fluorescence ratio in high versus low eGFP cells in 5 biological replicates. Data represents the mean and the S.E.M. Asterisks represent p-values of paired one-tailed t-test between groups (\*  $p < 0.05$ ). Scale bars correspond to 20 $\mu$ m. **b)** Sequential chromatin washes assay using 150mM salt buffer in untransduced control (Ctrl) or eGFP-SSX-C expressing HEK293T cells. BCOR, PCGF1 or Beta-Actin as a loading control were detected by western blot. **c)** Quantification of the protein distribution for BCOR, PCGF1 or Beta-Actin in the various washes. Data represents the percentage of total protein levels. **d)** Left, Immunofluorescence against H2AK119ub1 in HS-SY-II cells expressing the indicated eGFP-fused constructs. Right, quantification of H2AK119ub1 fluorescence ratio in high versus low eGFP cells in 7 biological replicates. Data represents the mean and the S.E.M. Asterisks represent p-values of paired one-tailed t-test between groups (\*\*\*)  $p < 0.001$ ). Scale bars represents 20 $\mu$ m. **e)** Left, Immunofluorescence against SS18 in HS-SY-II cells expressing the indicated eGFP-fused constructs. Right, quantification of the SS18 fluorescence ratio in high versus low eGFP cells in 2 biological replicates. Data represents the mean and the standard error of the mean (S.E.M). Asterisks represent p-values of paired one-tailed t-test between groups (\*  $p < 0.05$ ). Scale bars correspond to 20 $\mu$ m. **f)** H&E and immunohistochemical staining for Inhibin- $\alpha$ , SSX and H2AK119ub1 in human testis. Scale bar correspond to 40 $\mu$ m in the upper panel. Lower panel is a close-up from the images shown in the upper panel (area marked by a dashed line) where the scale bar corresponds to 20 $\mu$ m.



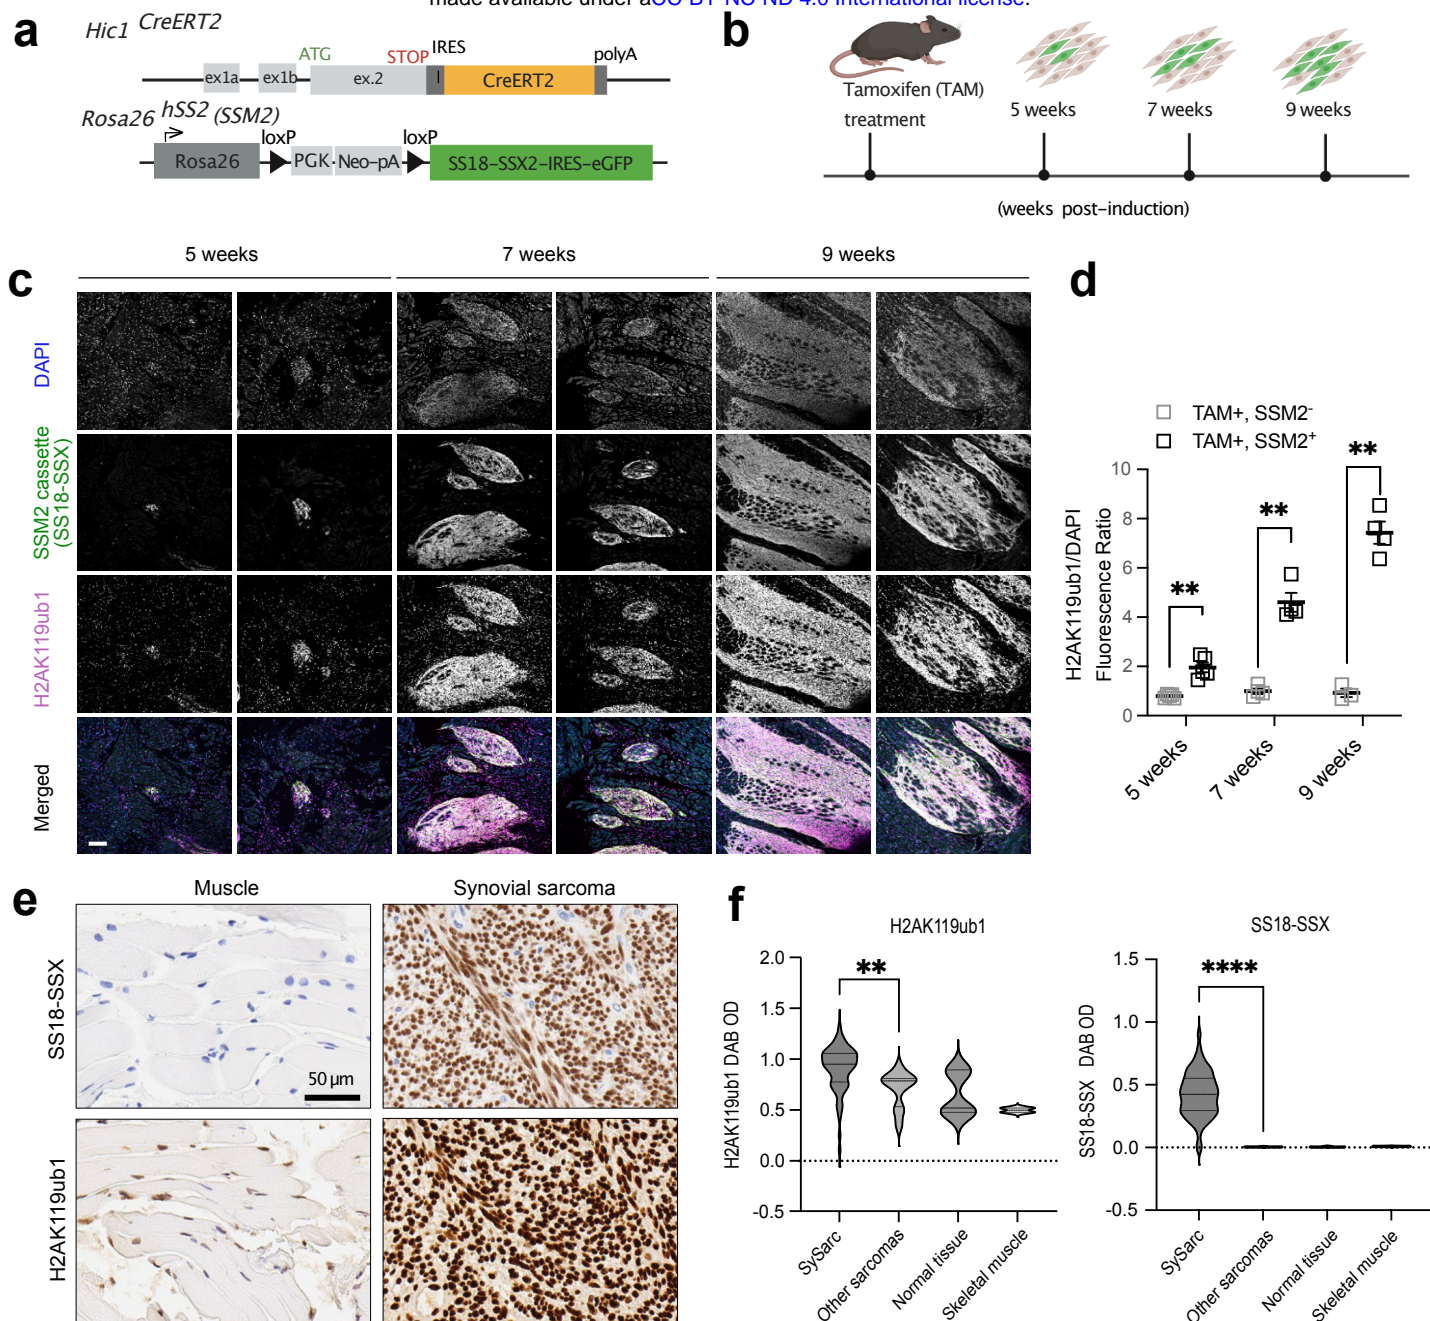

**Figure 7: High levels of H2AK119ub1 are acquired during synovial sarcoma development.**

**a**) Overview of the *Hic1*<sup>CreERT2</sup> knock-in allele (Scott et al, 2019) and of the *Rosa26*<sup>hSS2</sup> (also known as SSM2) allele (Haldar et al, 2007) for conditional induction of SS18-SSX2 in *Hic1*-expressing mesenchymal progenitors. Upon tamoxifen treatment CreERT2 mediates recombination between the two LoxP sites in SSM2 mice, thereby removing the transcriptional stop signal and allowing transcription of SS18-SSX2-IRES-EGFP from the endogenous ROSA26 promoter. **b**) Illustration of the time line for the tissue sample collection of samples analysed in (c, d) 8-week-old mice were treated with tamoxifen and tongue muscle tissues were collected at 5, 7 and 9 weeks post-induction. Figure 7a and 7b were created with BioRender.com. **c**) Immunofluorescence of *Hic1*<sup>CreERT2/creERT2</sup>; *Rosa26*<sup>SSM2/SSM2</sup> mice tongue tissue at 5, 7 or 9 weeks after induction by tamoxifen treatment. The cells are stained for DAPI, SSM2 (eGFP) and H2AK119ub1. The scale bar represents 100  $\mu$ m. **d**) Quantification of H2AK119ub1 signal intensity in normalised to DAPI signal intensity in 5 or 4 biological replicates of mice treated with tamoxifen (TAM) in SSM2 (GFP) negative tongue muscle or in adjacent SSM2 positive cell clusters. Asterisks represent p-values of paired one-tailed t-test between groups (\*\*  $p < 0.01$ ). **e**) Immunohistochemical staining for H2AK119ub1 on a tissue microarray of human surgical excised tissue specimens (left: skeletal muscle; right: synovial sarcoma). Scale bars correspond to 50 $\mu$ m in the left panel. **f**) Quantification of H2AK119ub1 DAB signal intensity across 37 synovial sarcomas (sample cores in duplicate), other sarcomas (1 case each of epithelioid sarcoma, sarcomatoid mesothelioma, Ewing sarcoma, sarcomatoid renal cell carcinoma, clear cell sarcoma, dedifferentiated liposarcoma, and myxoid liposarcoma) and normal tissues (normal skeletal muscle, ovarian stroma, breast glandular tissue, and testis controls). Quantification for the two skeletal muscle samples is also shown separately in the graph. All samples were stained in parallel on the same formalin-fixed, paraffin embedded tissue microarray slide. Asterisks represent p-values of Mann-Whitney test between groups (\*\*  $p < 0.01$ ).

### SS18-SSX interacts with and promotes H2AK119ub1 deposition

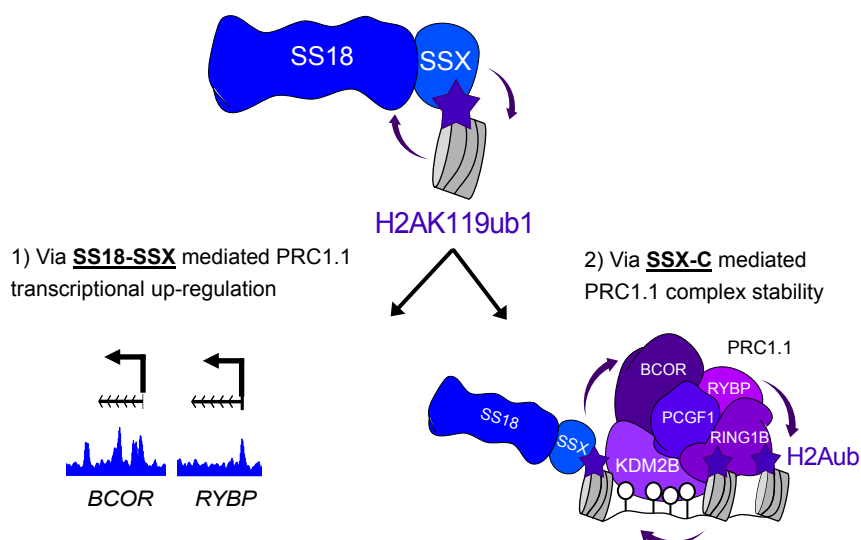

### Figure 8: An autoregulatory feedback loop converging on H2AK119ub1 drives synovial sarcoma.

Model depicting the strong interplay between SS18-SSX and H2AK119ub1 where SS18-SSX interacts with histones H2A which are ubiquitinated on their lysine K119. SS18-SSX then promotes further levels of H2AK119ub1 via two distinct mechanisms: 1) by stimulating the transcription of PRC1.1 members *BCOR* and *RYBP* as direct targets of the fusion and 2) by increasing the stability of the PRC1.1 complex on chromatin. In both cases H2AK119ub1 levels increase and therefore reinforce SS18-SSX's presence on chromatin.

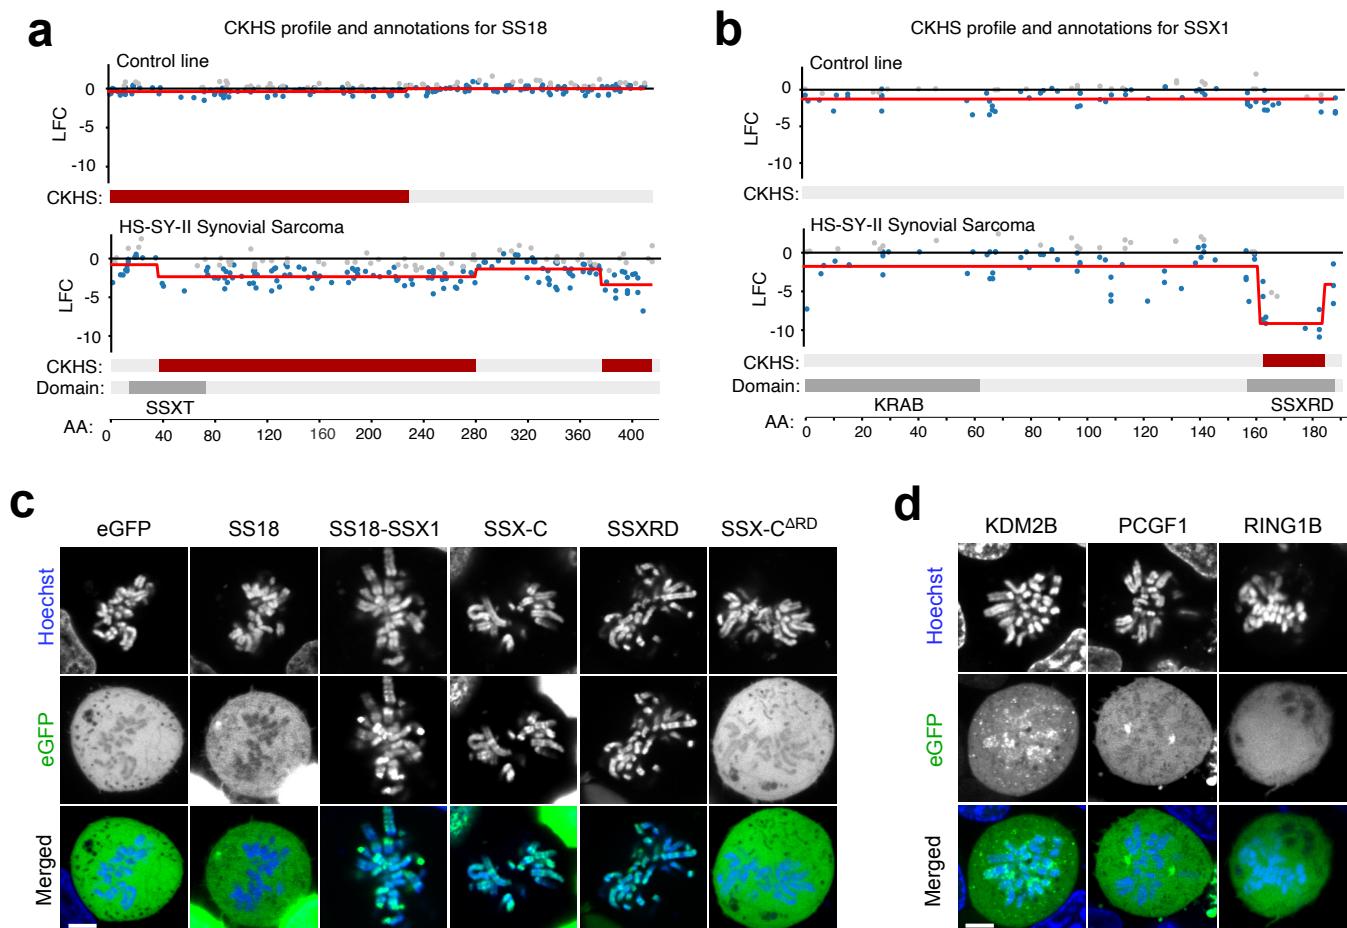

### Extended Figure 1

**a), b)** CRISPR knock-out hypersensitive (CKHS) regions and PFAM domain annotation for SS18 (**a**) and SSX1 (**b**) in control, fusion negative cell line (KHOS-240S, osteosarcoma cell line) and in HS-SY-II synovial sarcoma cell line harbouring an SS18-SSX1 fusion. CKHS regions are highlighted in dark red. **c), d)** Live confocal imaging images of metaphase HEK293T expressing eGFP fused constructs for SS18, SS18-SSX1, SSX-C, SSXRD and SSX-C<sup>ARD</sup> (**c**) or KDM2B, PCGF1 and RING1B (**d**). DNA is stained using Hoechst 33342. Scale bars correspond to 5µm.

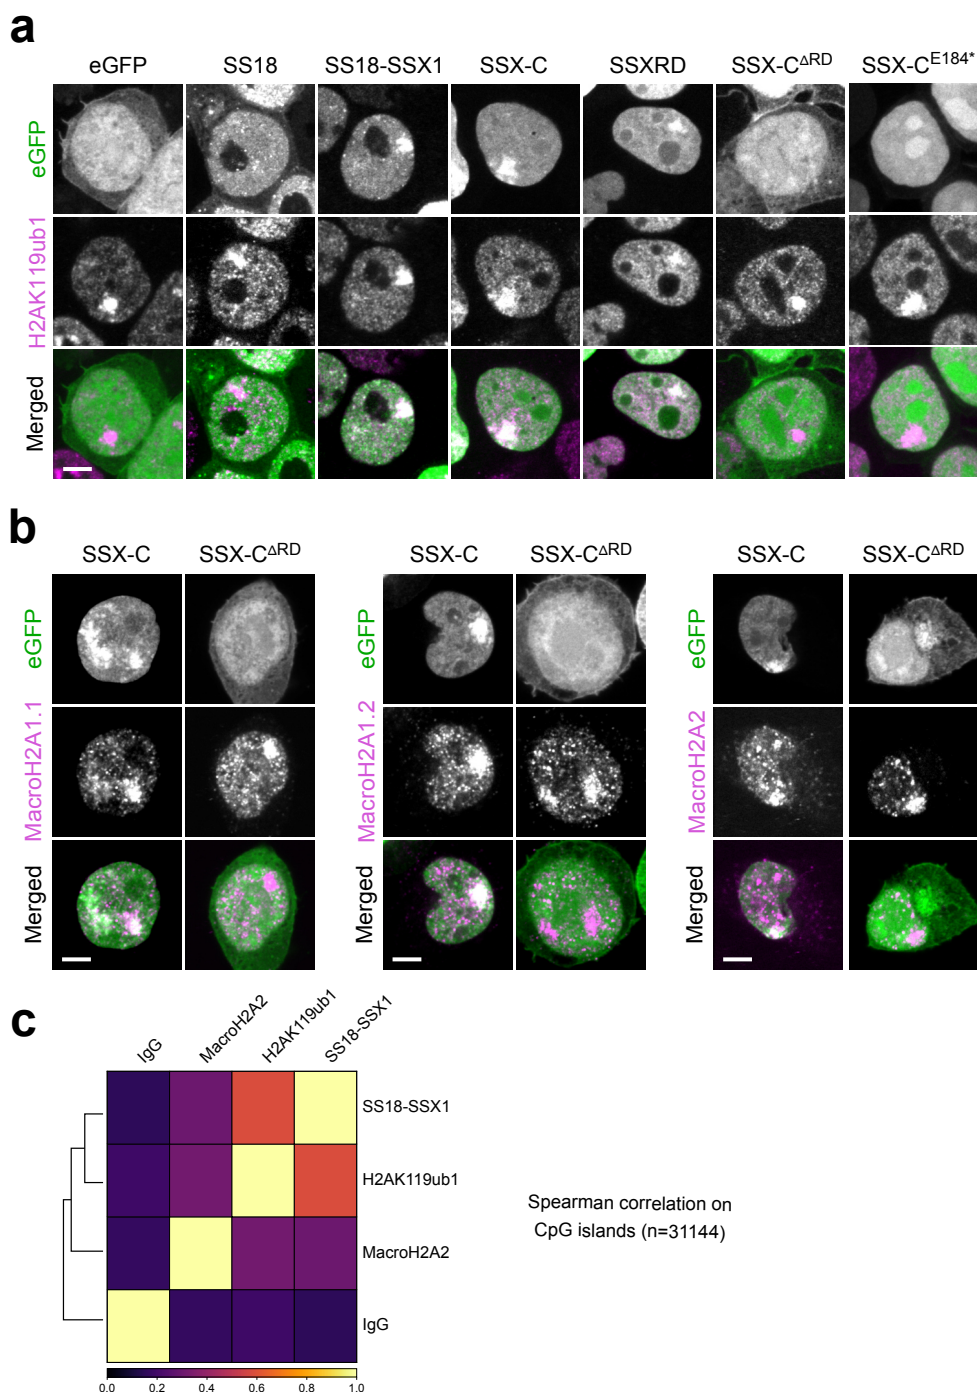

### Extended Figure 2

**a), b)** eGFP, H2AK119ub1 or histone MacroH2A immunofluorescence of HEK293T cells expressing the indicated eGFP constructs. Bottom panel displays merge channels with eGFP (green) and H2AK119ub1 (a) or histones MacroH2A (b) (magenta). Scale bars correspond to 5 $\mu$ m throughout the figures. **c)** Heatmap of Spearman correlation coefficients from bigWig coverages computed over genome CpG islands downloaded from UCSC genome track (<https://genome.ucsc.edu/>).

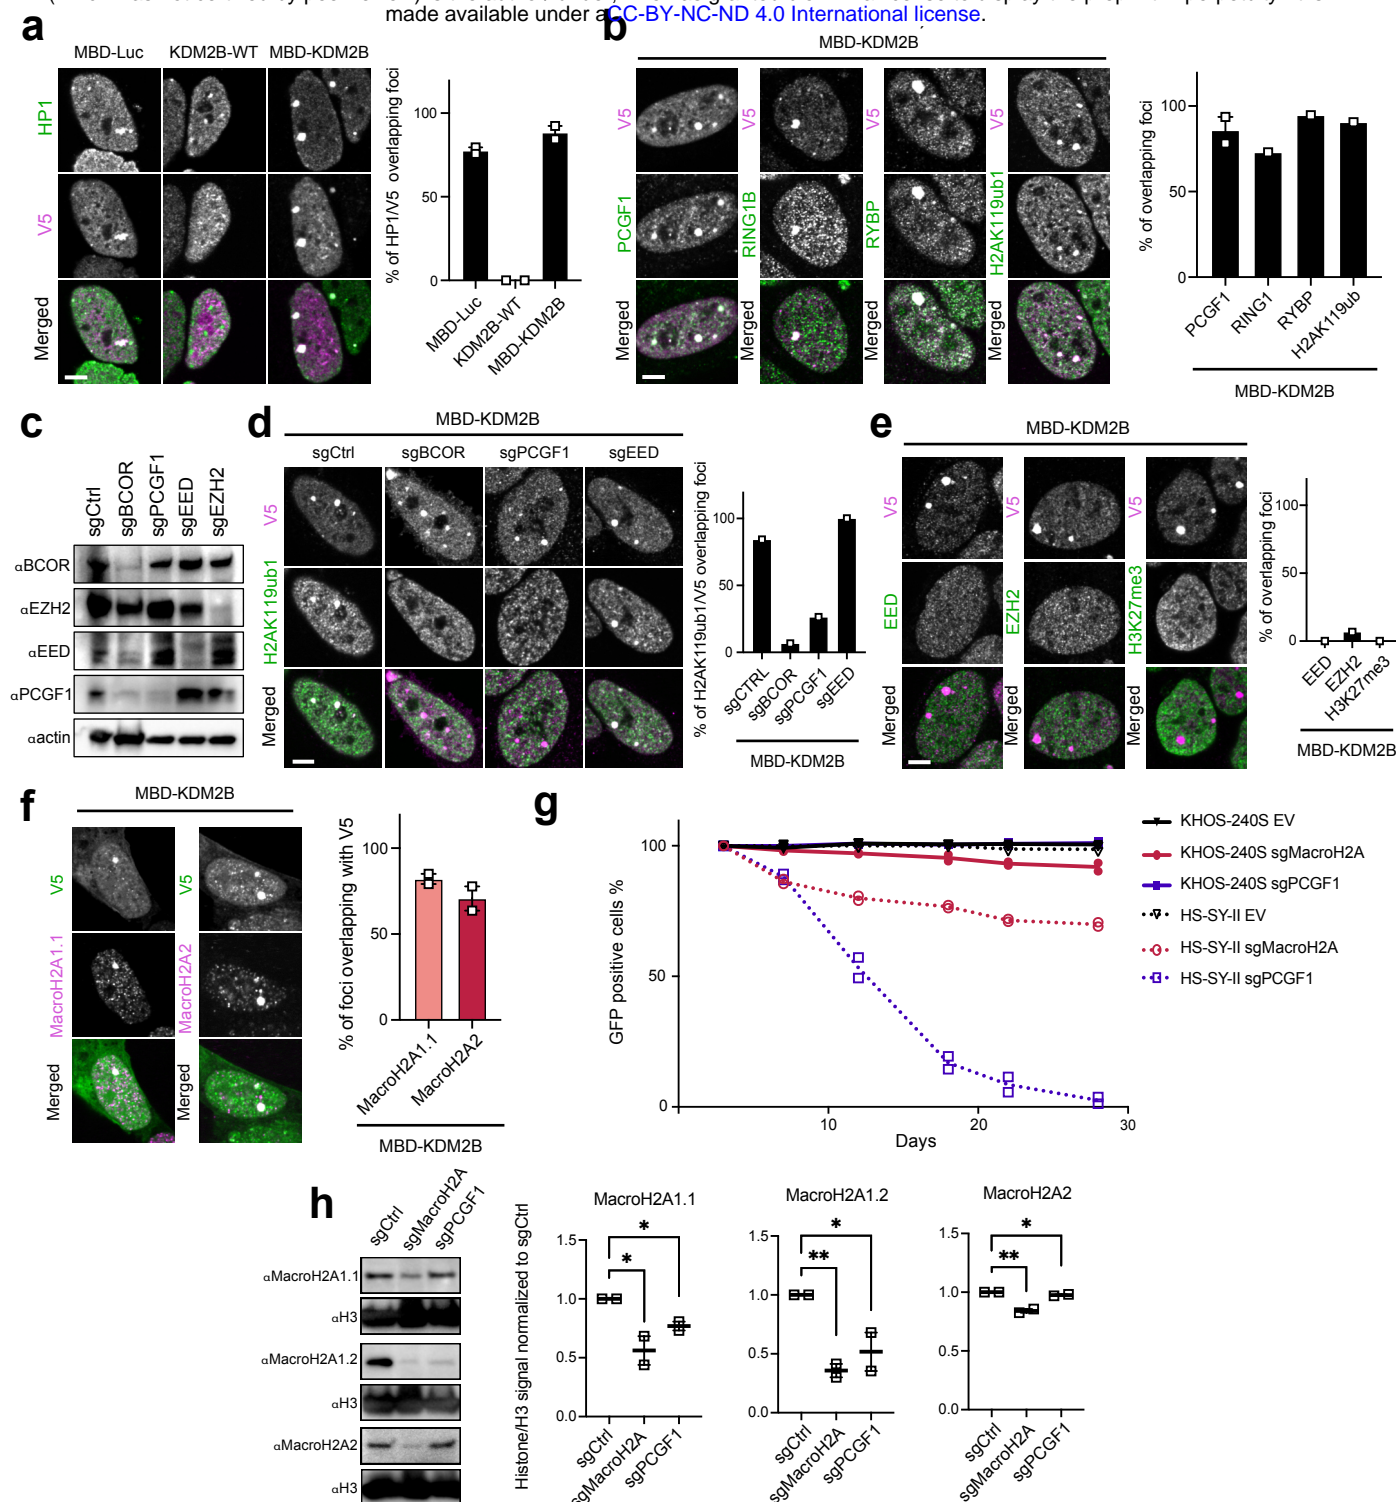

### Extended Figure 3

**a)** Left, Immunofluorescence for the MBD-Luc and KDM2B constructs or for KDM2B-WT fused to a V5 tag (V5, magenta) and HP1 (green). Scale bars represents 5 $\mu$ m throughout the figure. Right, quantification of the percentage of V5 foci overlapping HP1 foci in 2 biological replicates. Data represents the mean and the standard error of the mean (S.E.M). **b)** Left, Immunofluorescence of MBD-KDM2B (V5, magenta) with PCGF1, RING1B, RYBP and H2AK119ub1 (green). Right, quantification of the percentage of foci overlapping a V5 foci in 2 or 1 biological replicates. Data represents the mean and S.E.M when applicable. **c)** Western Blot of whole cell extracts from HS-SY-II-Cas9 cells expressing the various sgRNAs revealed using BCOR, EZH2, EED, PCGF1 or Beta-actin antibodies. **d)** Left, Immunofluorescence for MBD-KDM2B (V5, magenta) in the presence of different sgRNAs (resulting in eGFP background fluorescence) with H2AK119ub1 (green). Right, quantification of the percentage of H2AK119ub1 foci overlapping V5 foci in one biological replicate. **e)** Left, Immunofluorescence of MBD-KDM2B (V5, magenta) with EED, EZH2 or H3K27me3 (green). Right, quantification of the percentage of foci overlapping an V5 foci in 1 biological replicate. Data represents the mean. **f)** Left, Immunofluorescence of MBD-KDM2B (V5, magenta) with histones MacroH2A1.1 or MacroH2A2 (green). Right, quantification of the percentage of foci overlapping a V5 foci in 2 biological replicates. Data represents the mean and S.E.M. **g)** Cell competition assay performed in the osteosarcoma cell line KHOS-240S (fusion negative control) or in the synovial sarcoma line HS-SY-II transduced with an empty sgRNA as control or with guides targeting MacroH2A isoforms (sgMacroH2A) or PCGF1. **h)** Left, Western blot of histone acid extracts from HS-SY-II-Cas9 cells expressing sgCtrl, sgMacroH2A or sgPCGF1 revealed with MacroH2A1.1, MacroH2A1.2, MacroH2A2 and H3 antibodies. Right, Signal quantifications using H3 as normalization, ratios were later further normalized to sgCtrl. Data represents the mean and the standard error of the mean (S.E.M) of two biological replicates. Asterisks represent p-values of unpaired one-tailed t-test between groups (\*  $p < 0.05$  and \*\*  $p < 0.01$ ).

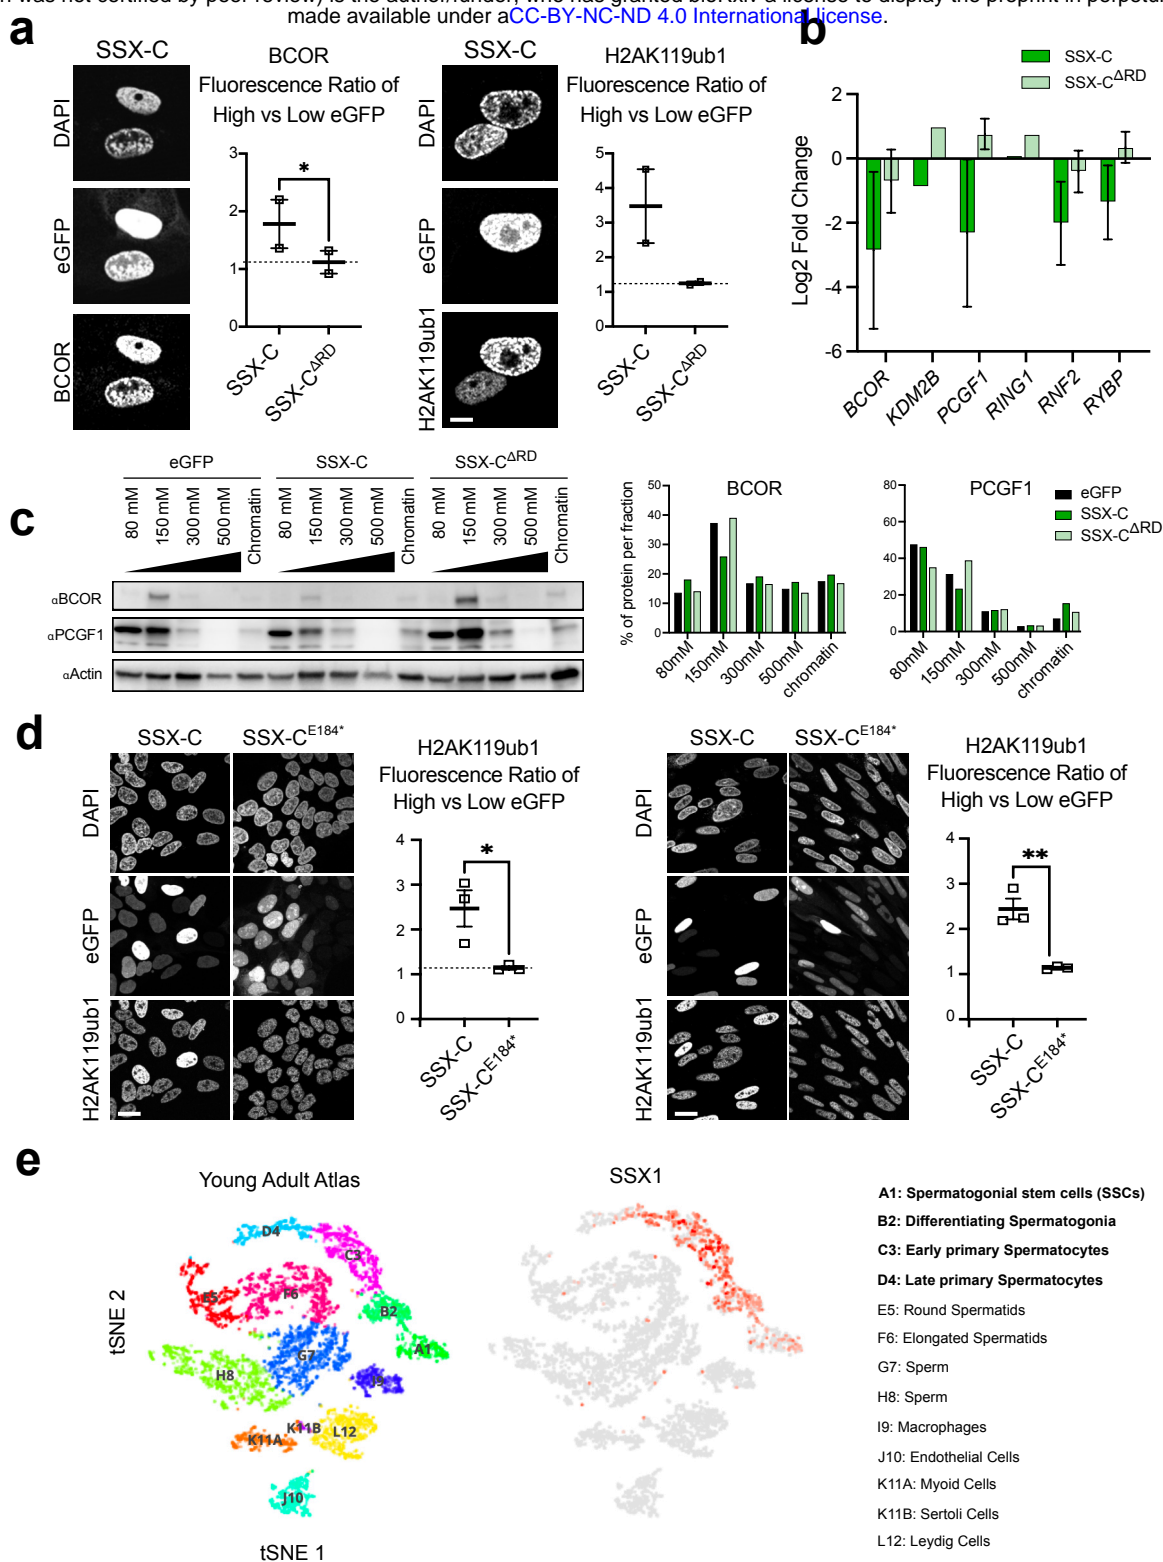

### Extended Figure 6

**a)** Left, Immunofluorescence against BCOR and H2AK119ub in mesenchymal stem cells (MSCs) expressing the indicated eGFP fused constructs with eGFP signals and nucleus stained with DAPI (grayscale). Right, quantification of BCOR or H2AK119ub1 fluorescence ratio in high versus low eGFP cells in 2 biological replicates. Data represents the mean and S.E.M. Asterisks represent p-values of paired one-tailed t-test between groups (\*  $p < 0.05$ ). Scale bars correspond to 10 $\mu$ m throughout the panel. **b)** qRT-PCR displaying Log<sub>2</sub> fold change of mRNA levels normalized by *GAPDH* in MSCs expressing eGFP-fused constructs (eGFP, eGFP-SSX-C and eGFP-SSX-C<sup>ΔRD</sup>) relative to eGFP expressing cells in two biological replicates. Data represents the mean and the standard error of the mean (S.E.M). **c)** Salt extraction assay in HS-SY-II expressing eGFP, eGFP-SSX-C and eGFP-SSX-C<sup>ΔRD</sup>. Proteins were detected by western blot using with BCOR, PCGF1 or Beta-actin (loading control) antibodies. **c)** Quantification of the protein distribution in the various fractions of the salt extraction for BCOR or PCGF1. Data represents the percentage of total protein levels. **d)** Immunofluorescence against H2AK119ub in HS-SY-II (left) or SYO-I (right) cells expressing the indicated eGFP-fused constructs (eGFP-SSX-C and eGFP-SSX-C<sup>E184\*</sup>). On the right of each panel of IF images are quantifications of the H2AK119ub1 fluorescence ratio in high versus low eGFP cells in 3 biological replicates. Data represents the mean and the standard error of the mean (S.E.M). Asterisks represent p-values of paired one-tailed t-test between groups (\*\*  $p < 0.01$ ). **e)** Left, tSNE and clustering analysis of combined single-cell transcriptome data from human testes ( $n = 6490$ ) from (Guo et al., 2018). Each dot represents a single cell and is colored according to its cluster identity as indicated on the figure key. The 13 cluster identities were assigned based on marker gene expression. Right, SSX1 expression pattern projected on the tSNE plot. Red indicates high expression and gray indicates low or no expression.

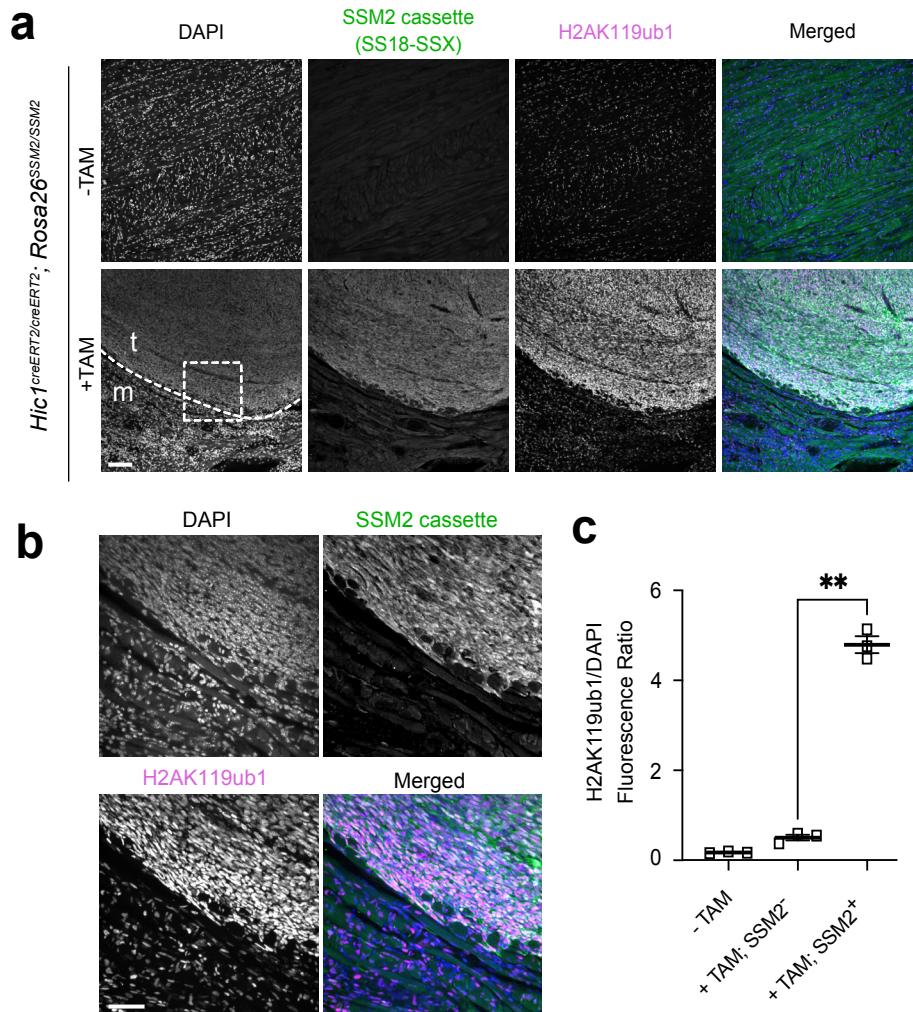

### Extended Figure 7

**a)** Immunofluorescence of *Hic1<sup>creERT2/creERT2</sup>; Rosa26<sup>SSM2/SSM2</sup>* mice at 16-week endpoint tongue tissue showing left, samples from control mice not treated with tamoxifen (-TAM) (upper panel) or from tamoxifen treated (+TAM) mice expressing the SSM2 cassette (human SS18-SSX) embedded in striated muscle (lower panel). The cells are stained for DAPI, SSM2 and H2AK119ub1. The scale bar represents 100  $\mu$ m. **b)** Close-ups of images shown in the panel above, area corresponds to dashed line in (a). **c)** Quantification of H2AK119ub signal intensity normalised to DAPI signal intensity in 3 biological replicates in -TAM control mice, or +TAM tongue muscle or adjacent tumours (SSM2 negative or positive respectively). Asterisks represent p-values of paired one-tailed t-test between groups (\*\*  $p < 0.01$ ).

**Table S1 - Sequence of DNA oligos used in this study**

| <b>sgRNAs</b>                  | <b>U6 Forward sequence</b> |
|--------------------------------|----------------------------|
| pLKO.1-puro U6 sgRNA-Ctrl      | caccgTCCCATTCTGGCCATTCT    |
| pLKO.1-puro U6 sgRNA-BcOR      | caccGGGGTGGAGCCACTCTACAG   |
| pLKO.1-puro U6 sgRNA-PCGF1     | caccgATGAAGACACTCTGTGATGG  |
| pLKO.1-puro U6 sgRNA-PCGF1 #1  | CACCGCCTCAGCTCTAACAGAACAT  |
| pLKO.1-puro U6 sgRNA-PCGF1 #2  | CACCGTTAGCATCAAGCGGTGACAC  |
| pLKO.1-puro U6 sgRNA-PCGF3 #1  | CACCGAGTTCGTGGTTGTCAGTAGG  |
| pLKO.1-puro U6 sgRNA-PCGF3 #2  | CACCGTGTAAACAGCAGCAAAGTGGC |
| pLKO.1-puro U6 sgRNA-SSX #1    | CACCGCATGCCAAGAAGCCAGCAG   |
| pLKO.1-puro U6 sgRNA-SSX #2    | CACCGCTCACGCAGTCTGTGGGTCC  |
| pLKO.1-puro U6 sgRNA EED #1    | caccgGGTGAAAAATAATGTCCTG   |
| pLKO.1-puro U6 sgRNA EED #2    | caccgACGATTATGGAATATCCAGA  |
| pLKO.1-puro U6 sgRNA-EZH2 #1   | caccGCAAGAAGTGCAGTATTCAG   |
| pLKO.1-puro U6 sgRNA-EZH2 #2   | caccgATTGCTGGCACCATCTGACG  |
| pLKO.1-puro U6 sgRNA-H2AFY #1  | caccgTGTCAAGTATTCCAGGACGG  |
| pLKO.1-puro U6 sgRNA-H2AFY #1  | caccgCAAGTACAGGATTGGAGTGG  |
| pLKO.1-puro U6 sgRNA-H2AFY2 #1 | caccgAATTGGCCGGCAATGCCGCG  |
| pLKO.1-puro U6 sgRNA-H2AFY2 #1 | caccgGCGGAAATTCTAGAATTGGC  |
|                                |                            |
| <b>qRT-PCR primers</b>         |                            |
| GAPDH F                        | GTCTCCTCTGACTTCAACAGCG     |
| GAPDH R                        | ACCACCCTGTTGCTGTAGCCAA     |
| SHH F                          | CCGAGCGATTTAAGGAACTCACC    |
| SHH R                          | AGCGTTCAACTTGTCTTACACC     |
| KCNQ2 F                        | TCATCGGTGTCTCCTTCTTCGC     |
| KCNQ2 R                        | GAGAGGTTGGTGGCGTAGAATC     |
| PAX2 F                         | GACTATGTTGCCTGGGAGATTC     |
| PAX2 R                         | AAGGCTGCTGAACCTTTGGTCCG    |
| UNCX F                         | AGAAGGCGTTCAACGAGAGCCA     |
| UNCX R                         | CGTGTCTCCTTCTTCTCCAC       |
| EN2 F                          | CGCGCAGCCCATGCTCTGGC       |
| EN2 R                          | GCTTGTCTCTTTGTTCCGGTTC     |
| BCOR F                         | TGTCTACCCGCTGTTACTGTG      |
| BCOR R                         | TCTCGGAGTCTTTGGTTGCTGG     |
| KDM2B F                        | CATGGAGTGCTCCATCTGCAATG    |
| KDM2B R                        | ACTTCGGACACTCCCAGCAGTT     |
| PCGF1 F                        | ACGAGACACAGCCACTGCTCAA     |
| PCGF1 R                        | TCCAAACCTCGGGACTGGTAGA     |
| RING1 F                        | CCTATCTGCCTGGACATGCTGA     |
| RING1 R                        | GCTTCTTTCCGGCAGGTAGGACA    |
| (RING1B) RNF2 F                | CAGTCACAGCATTGAGGAAGGAC    |
| (RING1B) RNF2 R                | GCTTCCTGATTGCTATGTGTGGA    |
| RYBP F                         | GGATTGTAGCGTCTGCACCTTC     |
| RYBP R                         | CTTGTTGTGCCACCAGCTGAGA     |



**Table S2- List of Antibodies used in this study**

| Name                                                  | Ref Number | Company        | Application          |
|-------------------------------------------------------|------------|----------------|----------------------|
| anti-NanoLuc                                          | MAB100261  | R&D Systems    | WB                   |
| BCoR (C10)                                            | sc-514576  | Santa Cruz     | WB, IF               |
| ECL Anti-Mouse IgG                                    | NXA931     | Sigma          | WB 2nd               |
| ECL Anti-Rabbit IgG                                   | NA934      | Sigma          | WB 2nd               |
| EED (E4L6E) XP® Rabbit mAb                            | #85322     | Cell Signaling | WB                   |
| Ezh2 (D2C9) XP Rabbit mAb                             | #5246      | Cell Signaling | WB                   |
| GFP (D5.1) XP® Rabbit mAb                             | #2956      | Cell Signaling | WB                   |
| HA-tag                                                | 9110       | Abcam          | ChIP-seq             |
| HA-Tag (6E2) Mouse mAb                                | 2367S      | Cell Signaling | IF                   |
| HA-Tag (C29F4) Rabbit mAb                             | #3724      | Cell Signaling | CUT&RUN, IF          |
| Histone H3 (1B1B2)                                    | #14269     | Cell Signaling | WB                   |
| HP1 (E-6)                                             | sc- 515341 | Santa Cruz     | IF                   |
| Macro H2A2 Antibody                                   | NBP1-92094 | Novusbio       | CUT&RUN, WB, IF      |
| MacroH2A1.1 Antibody (D5F6N)                          | #12455     | Cell Signaling | WB, IF               |
| MacroH2A1.2 Antibody                                  | #4827      | Cell Signaling | WB, IF               |
| PCGF1 (E-8)                                           | sc-515371  | Santa Cruz     | WB, IF               |
| RYBP (A-1)                                            | sc-374235  | Santa Cruz     | IF                   |
| SS18-SSX (E9X9V) XP                                   | #72364     | Cell Signaling | CUT&RUN, IHC         |
| SS18/SSX Antibody                                     | #70929     | Cell Signaling | WB, IF               |
| SSX (E5A2C)                                           | #23855     | Cell Signaling | IF, IHC              |
| β-Actin HRP                                           | A3854      | Sigma          | WB                   |
| SYT (a-10)                                            | sc-365170  | Santa Cruz     | IF                   |
| Tri-Methyl-Histone H3 (Lys27) (C36B11)                | #9733      | Cell Signaling | IF                   |
| Tri-Methyl-Histone H3 (Lys9) (D4W1U)                  | #13969     | Cell Signaling | IF                   |
| Ubiquityl-Histone H2A (Lys119) (D27C4) XP® Rabbit mAb | #8240      | Cell Signaling | CUT&RUN, WB, IF, IHC |
| V5 Tag Monoclonal Antibody (2F11F7), Alexa Fluor 555  | 2F11F7     | thermofisher   | IF                   |
| v5-Probe (E10)                                        | sc-81594   | Santa Cruz     | IF                   |
| V5-Taq (D3H8Q) Rabbit mAb                             | #13202     | Cell Signaling | IF                   |
